# Supplementary material for: One-pot access to sulfonylated naphthalenediols/hydroquinones from naphthols/phenols with sodium sulfinates in an aqueous medium
Source: Royal Society of Chemistry journal article supplement (doi:10.1039/d0nj05285j), 2020-12-08

## *Supporting Information*

# **One-pot access to sulfonlated naphthalenediols/hydroquinones from naphthols/phenols with sodium sulfinates in an aqueous medium**

Lingxin Meng<sup>a</sup>, Ruike Zhang<sup>a</sup>, Yuqiu Guan<sup>a</sup>, Tian Chen<sup>a</sup>, Zhiqiang Ding<sup>a</sup>, Gongshu Wang<sup>a</sup>, Aikebaier Reheman<sup>b\*</sup>, Zhangpei Chen<sup>a\*</sup>, and Jianshe Hu<sup>a</sup>

<sup>a</sup> Center for Molecular Science and Engineering, College of Sciences, Northeastern University, Shenyang 110819, P. R. China.

Email: [chenzhangpei@mail.neu.edu.cn](mailto:chenzhangpei@mail.neu.edu.cn).

<sup>b</sup> Key Laboratory of Toxicology, medical college, Ningde Normal University, Ningde, 352100, China.

Email: [akbarphd@126.com](mailto:akbarphd@126.com).

### **Table of Contents**

|                                                            |            |
|------------------------------------------------------------|------------|
| <b>1. General Information.....</b>                         | <b>S2</b>  |
| <b>2. General Synthetic Procedure for Products 3 .....</b> | <b>S2</b>  |
| <b>3. Scaled-up Experiments.....</b>                       | <b>S10</b> |
| <b>4. References.....</b>                                  | <b>S11</b> |
| <b>5. Copies of NMR spectra .....</b>                      | <b>S12</b> |

## 1. General Information

Unless otherwise mentioned, all the reagents and solvents were purchased from commercial sources and used without further purification. Reaction progress and product mixtures were routinely monitored by TLC, and compounds were visualized under ultraviolet light at 254 nm. The products were isolated by column chromatography on silica gel (200-300 mesh) by using petroleum ether and ethyl acetate as eluents.  $^1\text{H}$  NMR,  $^{13}\text{C}$  NMR and  $^{19}\text{F}$  NMR spectra were recorded on a Bruker AVANCE 400 spectrometer. The spectra were recorded using  $\text{DMSO-}d_6$  as a solvent.  $^1\text{H}$  NMR chemical shifts are referenced to tetramethylsilane (TMS, 0 ppm). NMR spectra are reported as follows: chemical shift, multiplicity (s = singlet, d = doublet, t = triplet, q = quarter, m = multiplet, br = broad), coupling ( $J$ ) constant and integration. Melting points were measured on an XT4 microscopic apparatus uncorrected. IR spectra were recorded on Thermo Scientific Nicolet iS5 Fourier transform infrared spectrometer by dispersing samples in potassium bromide. The high-resolution mass spectra (HR-MS) was measured using the Agilent 1290 Infinity LC & 6540 UHD Q-TOF mass spectrometer.

## 2. General Synthetic Procedure for Products 3

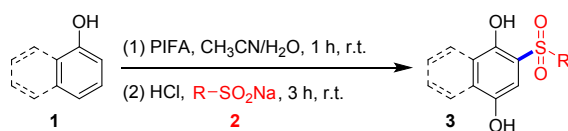

**Sulfonylation of 1-naphthalenol and phenols:** To a flask, the substrate **1** (0.30 mmol) was dropwise added to a solution of PIFA (283.8 mg, 0.66 mmol) in 3.0 mL of  $\text{CH}_3\text{CN/H}_2\text{O}$  (v/v=2:1), then the mixture was stirred at room temperature for 1 h under an ambient atmosphere. After that, the conc. HCl (25  $\mu\text{L}$ , 0.30 mmol) and sodium sulfinates **2** (0.36 mmol) were added separately, and the reaction mixture was stirred at room temperature for 3 h. After completion of reaction monitored by TLC, the reaction mixture was diluted with 5 mL saturated brine and extracted with ethyl acetate ( $3 \times 30$  mL). The combined organic extracts were dried over anhydrous  $\text{Na}_2\text{SO}_4$ . After filtration and evaporation of the solvents under reduced pressure, the crude product was purified by column chromatography on silica gel (petroleum ether/ethyl acetate: 10/1~2/1) to afford desired products **3a-r**.

## Optimization for sulfonylation of hydroquinone **4**

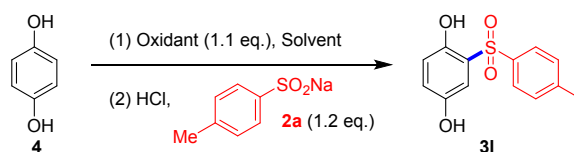

| Entry <sup>a</sup>   | Oxidant                                      | Solvent               | Time         | Yield (%) <sup>b</sup> |
|----------------------|----------------------------------------------|-----------------------|--------------|------------------------|
| 1                    | PIDA                                         | H <sub>2</sub> O      | 3 h          | 88                     |
| 2                    | <i>m</i> -CPBA                               | H <sub>2</sub> O      | 3 h          | 34                     |
| 3                    | PIFA                                         | H <sub>2</sub> O      | 3 h          | 63                     |
| 4                    | H <sub>2</sub> O <sub>2</sub>                | H <sub>2</sub> O      | 3 h          | N.R.                   |
| 5                    | K <sub>2</sub> S <sub>2</sub> O <sub>8</sub> | H <sub>2</sub> O      | 3 h          | N.R.                   |
| 6                    | TBHP                                         | H <sub>2</sub> O      | 3 h          | N.R.                   |
| 7                    | PIDA                                         | MeOH                  | 3 h          | 92                     |
| <b>8<sup>c</sup></b> | <b>PIDA</b>                                  | <b>H<sub>2</sub>O</b> | <b>5 min</b> | <b>97</b>              |
| 9 <sup>c</sup>       | PIFA                                         | H <sub>2</sub> O      | 5 min        | 38                     |

<sup>a</sup> Reaction conditions: Hydroquinone **4** (0.30 mmol), oxidant (0.33 mmol, 1.1 equiv.), solvent (3.0 mL) were added to a flask and stirred at room temperature for 1 h under air; then the aqueous HCl (0.30 mmol, 1.0 equiv.), 4-methylbenzenesulfinate **2a** (0.36 mmol, 1.2 equiv.) were added, and the mixture was stirred for 3 h to generate the product. <sup>b</sup> Isolated yields after column chromatography; N.R. means no reaction. <sup>c</sup> Hydroquinone **4** (33.0 mg, 0.30 mmol) was dropwise added to oxidant (0.33 mmol) in 3.0 mL H<sub>2</sub>O in a flask. Then conc. HCl (0.30 mmol) and **2a** (0.36 mmol) were sequentially added and the reaction mixture was stirred at room temperature for 5 min.

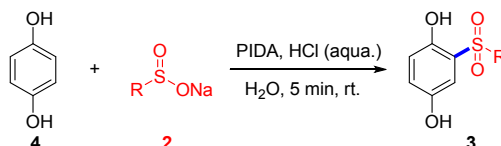

**Sulfonylation of hydroquinone **4**:** Hydroquinone **4** (33.0 mg, 0.30 mmol) was dropwise added to a suspension of PIDA (106.3 mg, 0.33 mmol) in 3.0 mL H<sub>2</sub>O in a flask. Then conc. HCl (25  $\mu$ L, 0.30 mmol) and sodium sulfinate **2** (0.36 mmol) were sequentially added and the reaction mixture was stirred at room temperature under an ambient atmosphere for 5 min. The reaction mixture was diluted with 5 mL saturated brine and extracted with ethyl acetate (3  $\times$  30 mL). The organic extracts were dried over anhydrous Na<sub>2</sub>SO<sub>4</sub>. After filtration and evaporation of the solvents under reduced pressure, the crude product was purified by column chromatography on silica gel (petroleum ether/ethyl acetate: 6/1~2/1) to afford desired products **3k-p**, **3s-w**.

The yield of product **3a-j** is based on 1-naphthalenol **1a**. The yields of product **3k-p**, **3s-w** is based on hydroquinone **4** and **3q-r** is based on 2,5-dimethylphenol and 2,6-dimethylphenol, respectively.

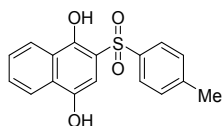

**2-tosyl naphthalene-1,4-diol (3a):** known compound<sup>1</sup>, 85.9 mg, 91% yield, faint yellow solid; <sup>1</sup>H NMR (400 MHz, DMSO-*d*<sub>6</sub>) δ 10.20 (br, 1H), 10.02 (br, 1H), 8.18 (d, *J* = 7.1 Hz, 1H), 8.13 (d, *J* = 6.9 Hz, 1H), 7.85 (dd, *J* = 7.9, 5.9 Hz, 2H), 7.67 – 7.55 (m, 2H), 7.41 (d, *J* = 8.1 Hz, 2H), 7.26 (s, 1H), 2.37 (s, 3H). <sup>13</sup>C NMR (101 MHz, DMSO-*d*<sub>6</sub>) δ 146.7, 145.9, 144.2, 139.5, 130.0, 128.8, 128.7, 127.9, 127.2, 126.7, 123.6, 122.8, 121.3, 104.1, 21.5.

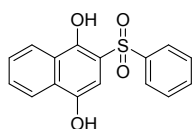

**2-(phenylsulfonyl)naphthalene-1,4-diol (3b):** known compound<sup>2</sup>, 74.3 mg, 81% yield, light yellow solid; <sup>1</sup>H NMR (400 MHz, DMSO-*d*<sub>6</sub>) δ 10.28 (br, 1H), 10.13 (br, 1H), 8.21 (dd, *J* = 15.3, 8.1 Hz, 2H), 8.02 – 8.00 (m, 2H), 7.69 – 7.53 (m, 5H), 7.41 (s, 1H). <sup>13</sup>C NMR (101 MHz, DMSO-*d*<sub>6</sub>) δ 146.9, 146.1, 142.4, 133.7, 129.6, 128.9, 128.8, 127.8, 127.2, 126.8, 123.7, 122.9, 121.2, 104.2.

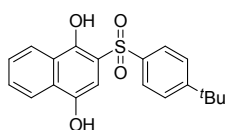

**2-((4-*tert*-butyl)phenyl)sulfonyl)naphthalene-1,4-diol (3c):** known compound<sup>1</sup>, 81.6 mg, 78% yield, brown red solid; <sup>1</sup>H NMR (400 MHz, DMSO-*d*<sub>6</sub>) δ 10.21 (br, 1H), 10.04 (br, 1H), 8.20 (d, *J* = 8.2 Hz, 1H), 8.13 (d, *J* = 8.0 Hz, 1H), 7.89 (d, *J* = 8.5 Hz, 2H), 7.63 – 7.57 (m, 4H), 7.28 (s, 1H), 1.23 (s, 9H). <sup>13</sup>C NMR (101 MHz, DMSO-*d*<sub>6</sub>) δ 156.8, 146.8, 145.9, 139.5, 128.8, 128.7, 127.7, 127.2, 126.7, 126.5, 123.7, 122.9, 121.1, 104.2, 35.4, 31.2.

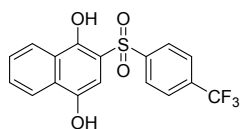

**2-((4-(trifluoromethyl)phenyl)sulfonyl)naphthalene-1,4-diol (3d):** known compound<sup>3</sup>, 96.8 mg, 88% yield, light yellow solid; <sup>1</sup>H NMR (400 MHz, DMSO-*d*<sub>6</sub>) δ 10.30 (br, 1H), 10.25 (br, 1H), 8.19 – 8.14 (m, 4H), 7.98 (d, *J* = 8.4 Hz, 2H), 7.65 (t, *J* = 7.0 Hz, 1H), 7.60 – 7.58 (m, 1H), 7.36 (s, 1H). <sup>13</sup>C NMR (101 MHz, DMSO-*d*<sub>6</sub>) δ 146.5, 145.9, 132.9, 132.6, 128.6, 128.5, 126.8, 126.4, 126.3, 126.3, 126.1, 123.3, 122.5, 120.6, 103.6. <sup>19</sup>F NMR (376 MHz, DMSO-*d*<sub>6</sub>) δ -61.7.

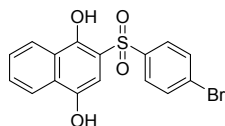

**2-((4-bromophenyl)sulfonyl)naphthalene-1,4-diol (3e):** unknown compound, 108.7 mg, 96% yield, brown solid, mp: 207-210 °C; IR (KBr): 3449, 3326, 1601, 1575, 1469, 1454, 1314, 1272, 1132, 1068, 628, 557  $\text{cm}^{-1}$ ;  $^1\text{H}$  NMR (400 MHz,  $\text{DMSO-}d_6$ )  $\delta$  10.35 (br, 1H), 10.25 (br, 1H), 8.24 (d,  $J = 8.2$  Hz, 2H), 7.97 (d,  $J = 7.6$  Hz, 2H), 7.86 (d,  $J = 8.3$  Hz, 2H), 7.71 – 7.56 (m, 2H), 7.43 (s, 1H).  $^{13}\text{C}$  NMR (101 MHz,  $\text{DMSO-}d_6$ )  $\delta$  147.0, 146.2, 141.7, 132.6, 130.0, 129.0, 128.8, 127.7, 127.3, 126.9, 123.8, 123.0, 121.4, 104.1.

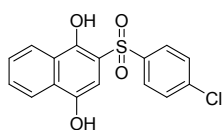

**2-((4-chlorophenyl)sulfonyl)naphthalene-1,4-diol (3f):** known compound<sup>1</sup>, 84.5 mg, 85% yield, brown red solid;  $^1\text{H}$  NMR (400 MHz,  $\text{DMSO-}d_6$ )  $\delta$  10.32 (br, 1H), 10.23 (br, 1H), 8.21 (d,  $J = 4.1$  Hz, 2H), 8.02 (d,  $J = 3.7$  Hz, 2H), 7.72 – 7.58 (m, 4H), 7.40 (s, 1H).  $^{13}\text{C}$  NMR (101 MHz,  $\text{DMSO-}d_6$ )  $\delta$  147.0, 146.1, 141.3, 138.7, 130.0, 129.7, 129.0, 128.8, 127.2, 126.9, 123.8, 123.0, 121.4, 104.1.

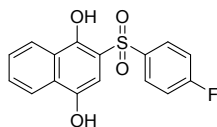

**2-((4-fluorophenyl)sulfonyl)naphthalene-1,4-diol (3g):** known compound<sup>1</sup>, 83.0 mg, 88% yield, brown solid;  $^1\text{H}$  NMR (400 MHz,  $\text{DMSO-}d_6$ )  $\delta$  10.24 (br, 1H), 10.14 (br, 1H), 8.19 (d,  $J = 8.2$  Hz, 1H), 8.15 (d,  $J = 8.1$  Hz, 1H), 8.04 (dd,  $J = 8.9, 5.2$  Hz, 2H), 7.67 – 7.56 (m, 2H), 7.45 (t,  $J = 8.8$  Hz, 2H), 7.31 (s, 1H).  $^{13}\text{C}$  NMR (101 MHz,  $\text{DMSO-}d_6$ )  $\delta$  165.1 (d,  $J = 252.0$  Hz), 146.8, 145.9, 138.7 (d,  $J = 2.9$  Hz), 131.1 (d,  $J = 9.8$  Hz), 128.9, 128.8, 127.2, 126.8, 123.3 (d,  $J = 78.8$  Hz), 121.5, 116.8, 116.6, 104.1.  $^{19}\text{F}$  NMR (376 MHz,  $\text{DMSO-}d_6$ )  $\delta$  -105.7.

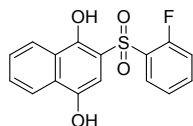

**2-((2-fluorophenyl)sulfonyl)naphthalene-1,4-diol (3h):** unknown compound, 89.7 mg, 94% yield, red solid, mp: 190-193 °C; IR (KBr): 3425, 3351, 1598, 1579, 1471, 1454, 1321, 1281, 1139, 1118, 1071, 698, 616  $\text{cm}^{-1}$ ;  $^1\text{H}$  NMR (400 MHz,  $\text{DMSO-}d_6$ )  $\delta$  10.25 (br, 1H), 10.12 (br, 1H), 8.16 (q,  $J = 9.8$ ,

9.1 Hz, 3H), 7.77 – 7.70 (m, 1H), 7.65 (t,  $J = 7.6$  Hz, 1H), 7.58 (t,  $J = 7.2$  Hz, 1H), 7.50 (t,  $J = 7.7$  Hz, 1H), 7.36 – 7.31 (m, 2H).  $^{13}\text{C}$  NMR (101 MHz,  $\text{DMSO-}d_6$ )  $\delta$  158.4 (d,  $J = 254.1$  Hz), 146.1, 145.9, 136.2 (d,  $J = 8.6$  Hz), 130.4, 129.6 (d,  $J = 13.6$  Hz), 128.5 (d,  $J = 14.0$  Hz), 126.7, 126.2, 124.8 (d,  $J = 3.5$  Hz), 123.3, 122.5, 120.8, 117.1 (d,  $J = 20.7$  Hz), 103.8.  $^{19}\text{F}$  NMR (376 MHz,  $\text{DMSO-}d_6$ )  $\delta$  -110.6. HRMS (ESI)  $m/z$ : calcd for  $\text{C}_{16}\text{H}_{12}\text{O}_4\text{FS}$   $[\text{M}+\text{H}]^+$ : 319.0440, found: 319.0438.

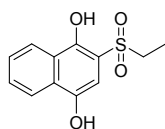

**2-(ethylsulfonyl)naphthalene-1,4-diol (3i)**: unknown compound, 63.7 mg, 84% yield, yellow solid, mp:117-120 °C; IR (KBr): 3444, 3307, 2924, 2853, 1660, 1603, 1587, 1330, 1302, 1146, 1054, 771, 690, 610, 557  $\text{cm}^{-1}$ ;  $^1\text{H}$  NMR (400 MHz,  $\text{DMSO-}d_6$ )  $\delta$  10.18 (br, 1H), 10.14 (br, 1H), 8.27 (d,  $J = 7.6$  Hz, 1H), 8.17 (d,  $J = 2.1$  Hz, 1H), 7.70 – 7.62 (m, 2H), 7.11 (s, 1H), 3.48 (q,  $J = 7.3$  Hz, 2H), 1.13 (t,  $J = 7.4$  Hz, 3H).  $^{13}\text{C}$  NMR (101 MHz,  $\text{DMSO-}d_6$ )  $\delta$  146.8, 145.9, 128.7, 128.6, 127.2, 126.8, 123.7, 122.9, 119.2, 104.6, 49.2, 7.6.

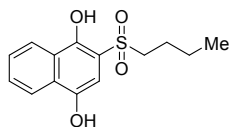

**2-(butylsulfonyl)naphthalene-1,4-diol (3j)**: known compound<sup>1,3</sup>, 69.4 mg, 83% yield, light yellow solid;  $^1\text{H}$  NMR (400 MHz,  $\text{DMSO-}d_6$ )  $\delta$  10.17 (br, 1H), 10.12 (br, 1H), 8.28 (d,  $J = 7.6$  Hz, 1H), 8.17 (d,  $J = 7.5$  Hz, 1H), 7.68 – 7.60 (m, 2H), 7.12 (s, 1H), 3.52 – 3.43 (m, 2H), 1.54 (p,  $J = 7.5$  Hz, 2H), 1.33 (h,  $J = 7.3$  Hz, 2H), 0.80 (t,  $J = 7.3$  Hz, 3H).  $^{13}\text{C}$  NMR (101 MHz,  $\text{DMSO-}d_6$ )  $\delta$  146.8, 145.9, 128.7, 128.6, 127.2, 126.9, 123.7, 122.9, 119.8, 104.5, 54.5, 24.9, 21.3, 13.9.

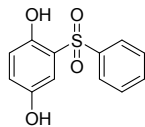

**2-(phenylsulfonyl)benzene-1,4-diol (3k)**: known compound<sup>4,5</sup>, 69.1 mg, 92% yield, light yellow solid;  $^1\text{H}$  NMR (400 MHz,  $\text{DMSO-}d_6$ )  $\delta$  9.98 (br, 1H), 9.43 (br, 1H), 7.91 (d,  $J = 8.0$  Hz, 2H), 7.64 (d,  $J = 7.5$  Hz, 1H), 7.58 (d,  $J = 7.0$  Hz, 2H), 7.36 (s, 1H), 6.94 (d,  $J = 8.7$  Hz, 1H), 6.76 (d,  $J = 7.8$  Hz, 1H).  $^{13}\text{C}$  NMR (101 MHz,  $\text{DMSO-}d_6$ )  $\delta$  150.0, 148.7, 141.8, 133.6, 129.3, 128.2, 126.5, 123.4, 119.0, 114.3.

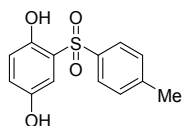

**2-(4-methylphenyl)sulfonylbenzene-1,4-diol (3l):** known compound<sup>2</sup>, 78.1 mg, 97% yield, light yellow solid; <sup>1</sup>H NMR (400 MHz, DMSO-*d*<sub>6</sub>) δ 9.91 (br, 1H), 9.39 (br, 1H), 7.78 (d, *J* = 8.3 Hz, 2H), 7.37 (d, *J* = 8.0 Hz, 2H), 7.32 (d, *J* = 3.1 Hz, 1H), 6.91 (dd, *J* = 8.8, 3.0 Hz, 1H), 6.73 (d, *J* = 8.8 Hz, 1H), 2.36 (s, 3H). <sup>13</sup>C NMR (101 MHz, DMSO-*d*<sub>6</sub>) δ 149.9, 148.6, 144.0, 139.0, 129.7, 128.3, 126.8, 123.2, 119.0, 114.2, 21.5.

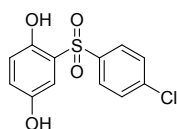

**2-(4-chlorophenyl)sulfonylbenzene-1,4-diol (3m):** known compound<sup>4</sup>, 78.1 mg, 91% yield, faint yellow solid; <sup>1</sup>H NMR (400 MHz, DMSO-*d*<sub>6</sub>) δ 10.08 (br, 1H), 9.46 (br, 1H), 7.92 (d, *J* = 8.4 Hz, 2H), 7.63 (d, *J* = 8.1 Hz, 2H), 7.37 (s, 1H), 6.96 (dd, *J* = 8.9, 2.7 Hz, 1H), 6.78 (d, *J* = 8.7 Hz, 1H). <sup>13</sup>C NMR (101 MHz, DMSO-*d*<sub>6</sub>) δ 149.7, 148.3, 140.2, 138.3, 129.9, 129.1, 125.7, 123.3, 118.7, 113.9.

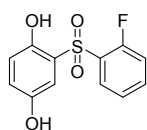

**2-(2-fluorophenyl)sulfonylbenzene-1,4-diol (3n):** unknown compound, 57.6 mg, 70% yield, light yellow solid, mp: 237-241 °C; IR (KBr): 3286, 3103, 1598, 1507, 1473, 1460, 1362, 1295, 1218, 1146, 1075, 603, 518 cm<sup>-1</sup>; <sup>1</sup>H NMR (400 MHz, DMSO-*d*<sub>6</sub>) δ 9.98 (br, 1H), 9.47 (br, 1H), 8.03 (td, *J* = 7.6, 1.8 Hz, 1H), 7.73 (tdd, *J* = 7.4, 5.0, 1.8 Hz, 1H), 7.45 (t, *J* = 7.6 Hz, 1H), 7.39 – 7.29 (m, 2H), 6.95 (dd, *J* = 8.8, 3.0 Hz, 1H), 6.73 (d, *J* = 8.8 Hz, 1H). <sup>13</sup>C NMR (101 MHz, DMSO-*d*<sub>6</sub>) δ 158.8 (d, *J* = 254.2 Hz), 149.8, 148.7, 136.6 (d, *J* = 8.6 Hz), 131.4, 129.4 (d, *J* = 13.5 Hz), 126.1, 125.0 (d, *J* = 3.6 Hz), 123.8, 118.9, 117.4 (d, *J* = 20.8 Hz), 114.5. <sup>19</sup>F NMR (376 MHz, DMSO-*d*<sub>6</sub>) δ -110.8. HRMS (ESI) *m/z*: calcd for C<sub>12</sub>H<sub>10</sub>O<sub>4</sub>SF [M+H]<sup>+</sup>: 269.0284, found: 269.0280.

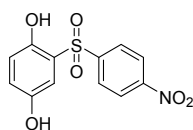

**2-(4-nitrophenyl)sulfonylbenzene-1,4-diol (3o):** known compound<sup>3</sup>, 68.4 mg, 78% yield, light yellow solid; <sup>1</sup>H NMR (400 MHz, DMSO-*d*<sub>6</sub>) δ 10.20 (br, 1H), 9.51 (br, 1H), 8.39 (d, *J* = 8.8 Hz, 2H),

8.14 (d,  $J = 8.8$  Hz, 2H), 7.35 (d,  $J = 3.0$  Hz, 1H), 6.97 (dd,  $J = 8.8, 3.0$  Hz, 1H), 6.77 (d,  $J = 8.8$  Hz, 1H).  $^{13}\text{C}$  NMR (101 MHz,  $\text{DMSO-}d_6$ )  $\delta$  150.5, 150.1, 148.9, 147.1, 129.9, 125.1, 124.7, 124.3, 119.1, 114.2.

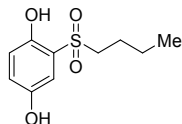

**2-(butylsulfonyl)benzene-1,4-diol (3p):** unknown compound, 58.7 mg, 85% yield, white solid, mp: 97-100 °C; IR (KBr): 3367, 3345, 2969, 2870, 1502, 1467, 1318, 1270, 1116, 1055, 729, 635, 564, 523  $\text{cm}^{-1}$ ;  $^1\text{H}$  NMR (400 MHz,  $\text{DMSO-}d_6$ )  $\delta$  10.17 (br, 1H), 9.33 (br, 1H), 7.10 (d,  $J = 2.9$  Hz, 1H), 6.92 (dd,  $J = 8.8, 2.9$  Hz, 1H), 6.86 (d,  $J = 8.8$  Hz, 1H), 3.36 (t,  $J = 1.7$  Hz, 2H), 1.48 (p,  $J = 7.8, 7.4$  Hz, 2H), 1.32 (h,  $J = 7.3$  Hz, 2H), 0.82 (t,  $J = 7.3$  Hz, 3H).  $^{13}\text{C}$  NMR (101 MHz,  $\text{DMSO-}d_6$ )  $\delta$  149.6, 148.1, 124.7, 122.4, 118.4, 114.2, 52.8, 24.3, 20.8, 13.4. HRMS (ESI)  $m/z$ : calcd for  $\text{C}_{10}\text{H}_{15}\text{O}_4\text{S}$   $[\text{M}+\text{H}]^+$ : 231.0691, found: 231.0684.

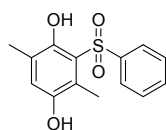

**2,5-dimethyl-3-(phenylsulfonyl)benzene-1,4-diol (3q):** known compound<sup>3</sup>, 65.8 mg, 80% yield, white solid;  $^1\text{H}$  NMR (400 MHz,  $\text{DMSO-}d_6$ )  $\delta$  9.72 (br, 1H), 9.29 (br, 1H), 7.85 (d,  $J = 7.6$  Hz, 2H), 7.72 (t,  $J = 7.3$  Hz, 1H), 7.63 (t,  $J = 7.4$  Hz, 2H), 6.98 (s, 1H), 2.13 (d,  $J = 2.9$  Hz, 6H).  $^{13}\text{C}$  NMR (101 MHz,  $\text{DMSO-}d_6$ )  $\delta$  148.5, 148.4, 142.3, 134.1, 129.9, 126.6, 125.8, 124.4, 121.8, 120.8, 16.5, 12.7.

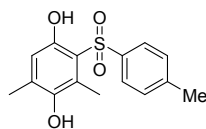

**3,5-dimethyl-2-tosylbenzene-1,4-diol (3r):** known compound<sup>6</sup>, 59.2 mg, 68% yield, light orange solid;  $^1\text{H}$  NMR (400 MHz,  $\text{DMSO-}d_6$ )  $\delta$  9.74 (br, 1H), 8.11 (s, 1H), 7.72 (d,  $J = 8.0$  Hz, 2H), 7.39 (d,  $J = 7.9$  Hz, 2H), 6.59 (br, 1H), 2.36 (d,  $J = 6.3$  Hz, 6H), 2.14 (s, 3H).  $^{13}\text{C}$  NMR (101 MHz,  $\text{DMSO-}d_6$ )  $\delta$  150.5, 146.6, 144.0, 140.5, 135.2, 129.9, 127.0, 125.7, 121.0, 117.3, 21.4, 17.7, 13.6.

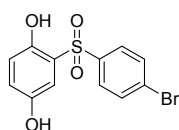

**2-((4-bromophenyl)sulfonyl)benzene-1,4-diol (3s):** known compound<sup>2</sup>, 90.2 mg, 91% yield, faint



yellow solid;  $^1\text{H}$  NMR (400 MHz,  $\text{DMSO-}d_6$ )  $\delta$  10.06 (br, 1H), 9.46 (br, 1H), 7.85 – 7.77 (m, 4H), 7.34 (d,  $J = 5.1$  Hz, 1H), 6.95 (d,  $J = 3.0$  Hz, 1H), 6.77 (d,  $J = 3.5$  Hz, 1H).  $^{13}\text{C}$  NMR (101 MHz,  $\text{DMSO-}d_6$ )  $\delta$  150.0, 148.7, 141.0, 132.4, 130.4, 127.7, 126.0, 123.7, 119.1, 114.2.

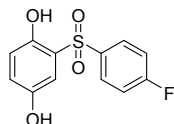

**2-((4-fluorophenyl)sulfonyl)benzene-1,4-diol (3t):** known compound<sup>2</sup>, 74.9 mg, 93% yield, faint yellow solid;  $^1\text{H}$  NMR (400 MHz,  $\text{DMSO-}d_6$ )  $\delta$  10.07 (br, 1H), 9.45 (br, 1H), 7.99 (dd,  $J = 8.1, 5.2$  Hz, 2H), 7.44 – 7.35 (m, 3H), 6.96 (dd,  $J = 8.6, 2.6$  Hz, 1H), 6.78 (d,  $J = 8.7$  Hz, 1H).  $^{13}\text{C}$  NMR (101 MHz,  $\text{DMSO-}d_6$ )  $\delta$  165.1 (d,  $J = 252.3$  Hz), 150.0, 148.6, 138.1 (d,  $J = 2.9$  Hz), 131.5 (d,  $J = 9.7$  Hz), 126.4, 123.5, 119.0, 116.4 (d,  $J = 22.8$  Hz), 114.2.  $^{19}\text{F}$  NMR (376 MHz,  $\text{DMSO-}d_6$ )  $\delta$  -105.8.

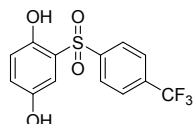

**2-((4-(trifluoromethyl)phenyl)sulfonyl)benzene-1,4-diol (3u):** known compound<sup>2</sup>, 95.0 mg, 96% yield, light yellow solid;  $^1\text{H}$  NMR (400 MHz,  $\text{DMSO-}d_6$ )  $\delta$  10.11 (br, 1H), 9.47 (br, 1H), 8.09 (d,  $J = 8.2$  Hz, 2H), 7.97 (d,  $J = 8.4$  Hz, 2H), 7.34 (d,  $J = 3.0$  Hz, 1H), 6.95 (dd,  $J = 8.8, 3.0$  Hz, 1H), 6.75 (d,  $J = 8.8$  Hz, 1H).  $^{13}\text{C}$  NMR (101 MHz,  $\text{DMSO-}d_6$ )  $\delta$  149.6, 148.4, 145.2, 132.8 (q,  $J = 32.2$  Hz), 128.8, 126.1 (d,  $J = 3.7$  Hz), 124.9 (d,  $J = 18.8$  Hz), 123.6, 122.1, 118.7, 113.8.  $^{19}\text{F}$  NMR (376 MHz,  $\text{DMSO-}d_6$ )  $\delta$  -61.7.

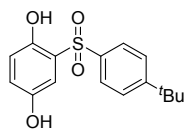

**2-((4-(tert-butyl)phenyl)sulfonyl)benzene-1,4-diol (3v):** known compound<sup>2</sup>, 77.8 mg, 88% yield, faint yellow solid;  $^1\text{H}$  NMR (400 MHz,  $\text{DMSO-}d_6$ )  $\delta$  9.92 (br, 1H), 9.38 (br, 1H), 7.82 (d,  $J = 8.5$  Hz, 2H), 7.60 (d,  $J = 8.5$  Hz, 2H), 7.32 (d,  $J = 3.0$  Hz, 1H), 6.91 (dd,  $J = 8.7, 3.0$  Hz, 1H), 6.73 (d,  $J = 8.8$  Hz, 1H), 1.28 (s, 9H).  $^{13}\text{C}$  NMR (101 MHz,  $\text{DMSO-}d_6$ )  $\delta$  156.6, 149.9, 148.6, 139.0, 128.2, 126.8, 126.2, 123.2, 119.0, 114.3, 35.4, 31.2.

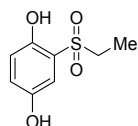

**2-(ethylsulfonyl)benzene-1,4-diol (3w):** known compound<sup>2</sup>, 50.9 mg, 83% yield, white solid; <sup>1</sup>H NMR (400 MHz, DMSO-*d*<sub>6</sub>) δ 10.17 (br, 1H), 9.38 (br, 1H), 7.12 (d, *J* = 4.3 Hz, 1H), 6.93 (d, *J* = 3.0 Hz, 1H), 6.89 (d, *J* = 7.8 Hz, 1H), 3.37 (dd, *J* = 13.6, 6.9 Hz, 2H), 1.09 (t, *J* = 6.4 Hz, 3H). <sup>13</sup>C NMR (101 MHz, DMSO-*d*<sub>6</sub>) δ 150.0, 148.6, 124.4, 122.9, 118.8, 114.8, 48.0, 7.4.

### 3. Scaled-up Experiments

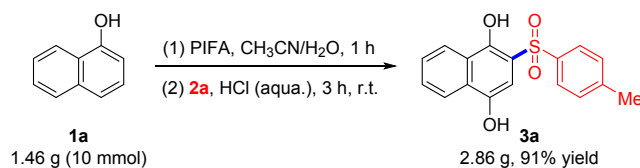

To a solution of PIFA (9.65 g, 22 mmol) in 40 mL CH<sub>3</sub>CN/H<sub>2</sub>O (v/v=2/1) was added dropwise a solution of 1-naphthalenol **1** (1.46 g, 10 mmol) in a 250 mL round bottom flask in 40 mL CH<sub>3</sub>CN/H<sub>2</sub>O (v/v=2/1), stirred at room temperature for 1 h under an ambient atmosphere. Then HCl (10 mmol) and sodium 4-methylbenzenesulfinate **2a** (2.18 g, 12 mmol) in 20 mL CH<sub>3</sub>CN/H<sub>2</sub>O (v/v=2/1) was added dropwise into the mixture. After stirring at room temperature for 3 h, the mixture was quenched with saturated aq. NaHCO<sub>3</sub> and concentrated to ca. 25 mL under a reduced pressure. The mixture was filtered, and the filter residue was washed with water and petroleum ether. Then the residue was redissolved in ethanol, concentrated to dryness on a rotary evaporator to afford product **3a** (2.86 g) in 91% yield.

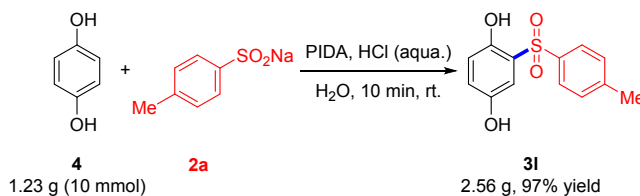

To a suspension of PIDA (3.65 g, 11 mmol) in 40 mL H<sub>2</sub>O was added dropwise a solution of hydroquinone **4** (1.12 g, 10 mmol) in a 250 mL round bottom flask in 40 mL H<sub>2</sub>O, stirred at room temperature. Then HCl (10 mmol) and sodium 4-methylbenzenesulfinate **2a** (2.18 g, 12 mmol) in 20 mL H<sub>2</sub>O was added dropwise into the mixture at room temperature under an ambient atmosphere. Right after the addition of the reagents, the mixture was quenched with saturated aq. NaHCO<sub>3</sub>. The mixture was filtered, and the filter residue was washed with water and hexane. Then the residue was redissolved in ethanol, concentrated to dryness on a rotary evaporator to afford product **31** (2.56 g) in 97% yield.

#### 4. References

1. P.-G. Li, Y.-C. Li, T. Zhu, L.-H. Zou and Z. Wu, *Eur. J. Org. Chem.*, 2017, **2017**, 6081-6084.
2. J.-W. Yuan, S.-N. Liu and L.-B. Qu, *Tetrahedron*, 2017, **73**, 6763-6772.
3. B. Li, Y. Li, L. Yu, X. Wu and W. Wei, *Tetrahedron*, 2017, **73**, 2760-2765.
4. D. Nematollahi, S. Momeni and S. Khazalpour, *Electrochim. Acta*, 2014, **147**, 310-318.
5. S. Rouhani, A. Rostami, A. Salimi and O. Pourshiani, *Biochem. Eng. J.*, 2018, **133**, 1-11.
6. J. Yadav, B. Reddy, T. Swamy and N. Ramireddy, *Synthesis*, 2004, **11**, 1849-1853.

## 5. Copies of NMR spectra

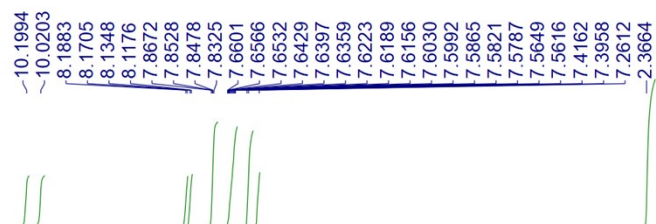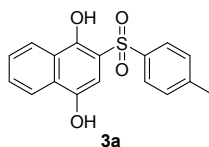

<sup>1</sup>H NMR (400 MHz, DMSO-*d*<sub>6</sub>)

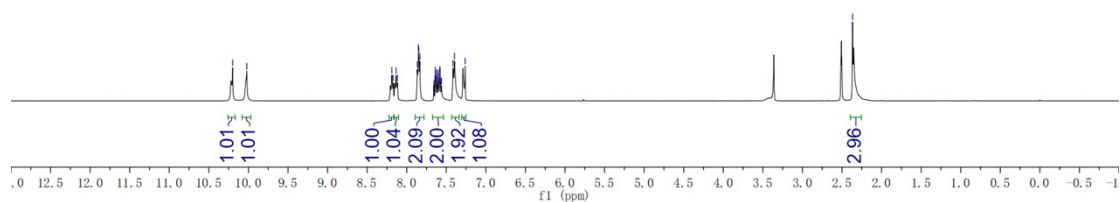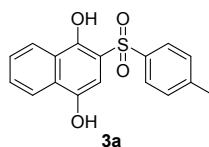

<sup>13</sup>C NMR (101 MHz, DMSO-*d*<sub>6</sub>)

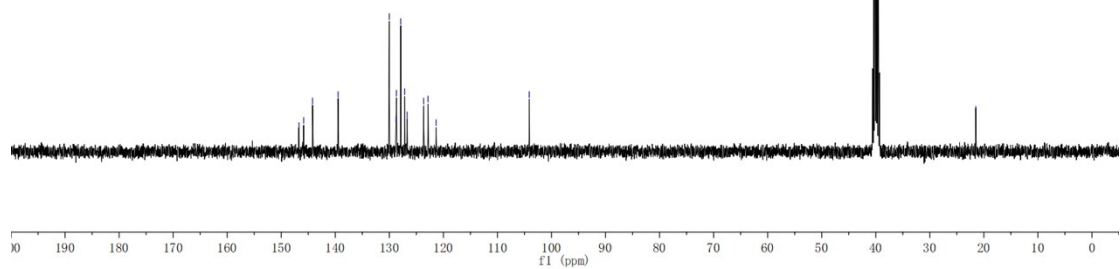

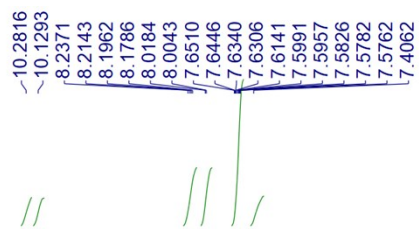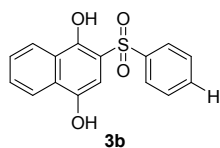

<sup>1</sup>H NMR (400 MHz, DMSO-*d*<sub>6</sub>)

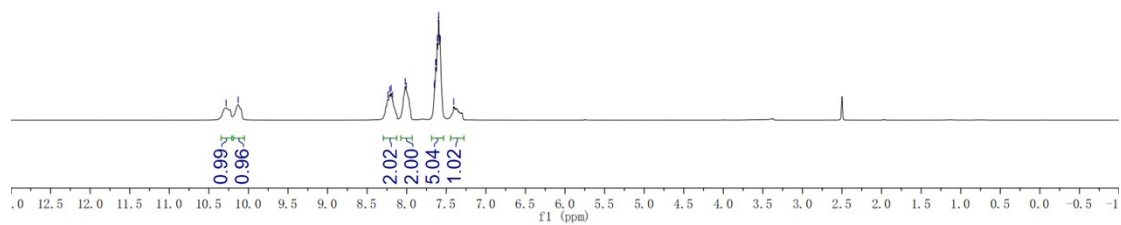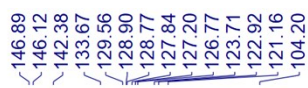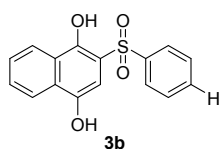

<sup>13</sup>C NMR (101 MHz, DMSO-*d*<sub>6</sub>)

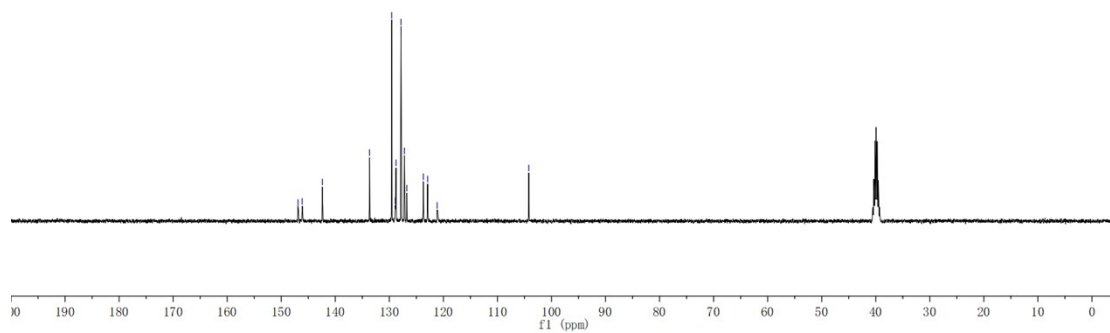

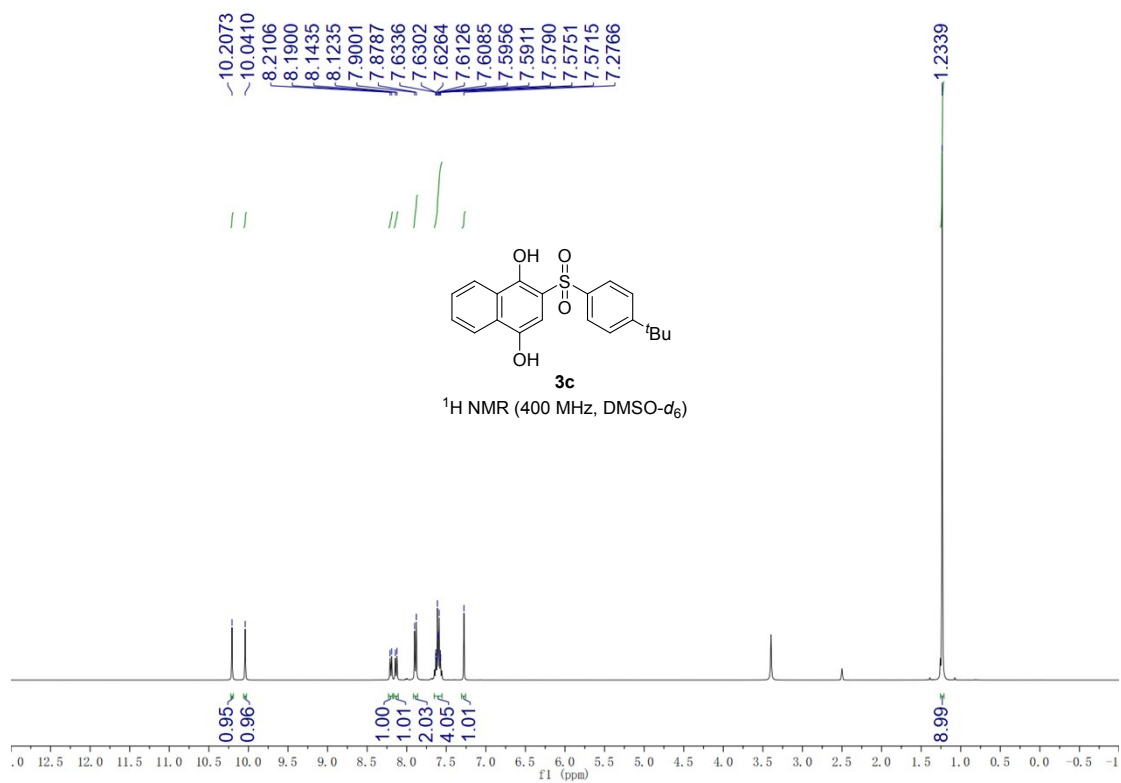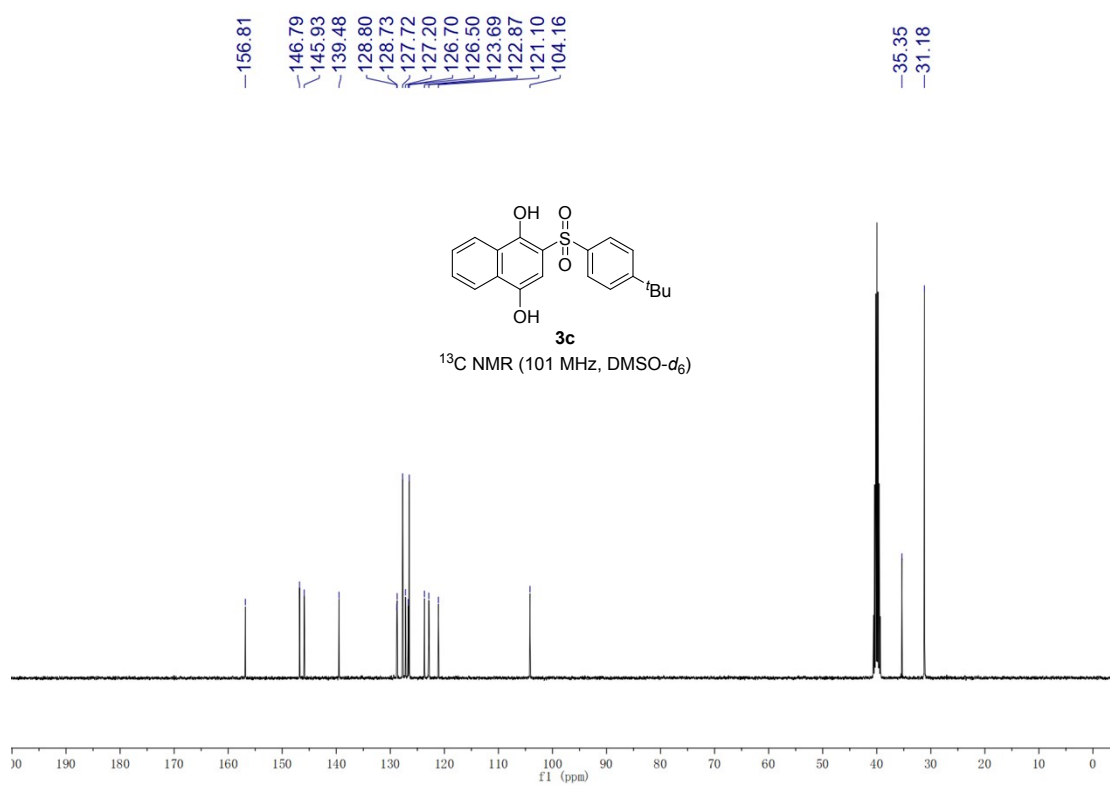

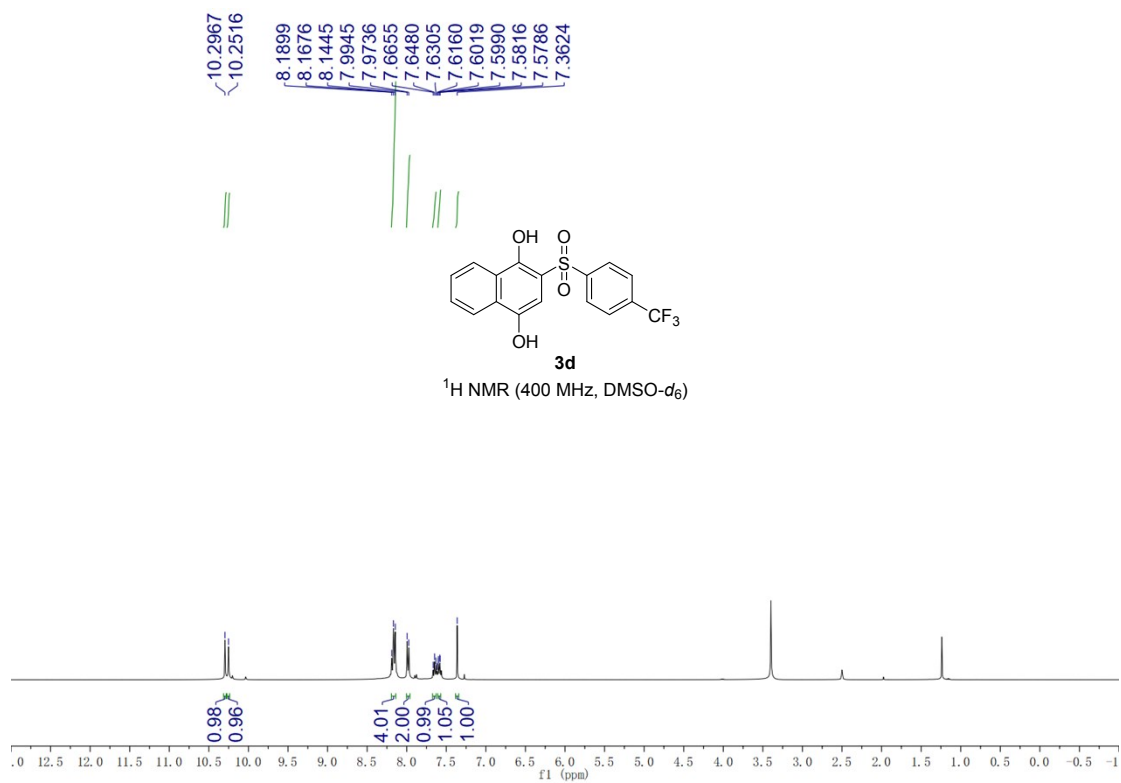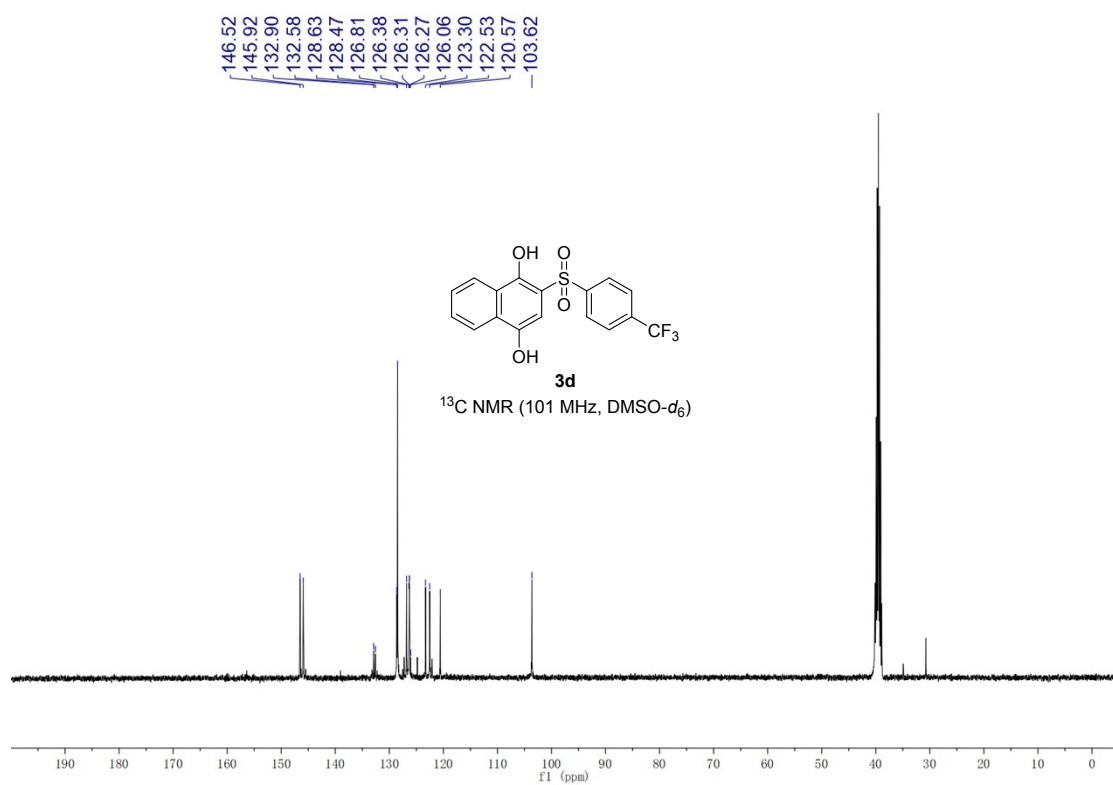



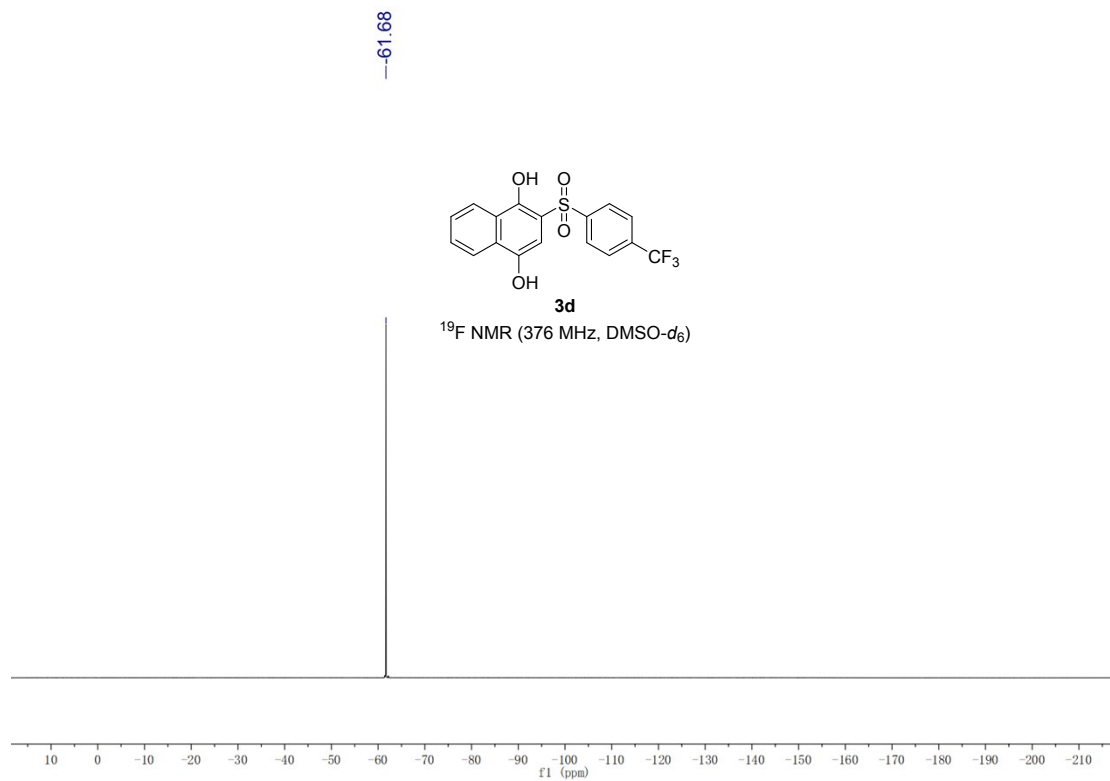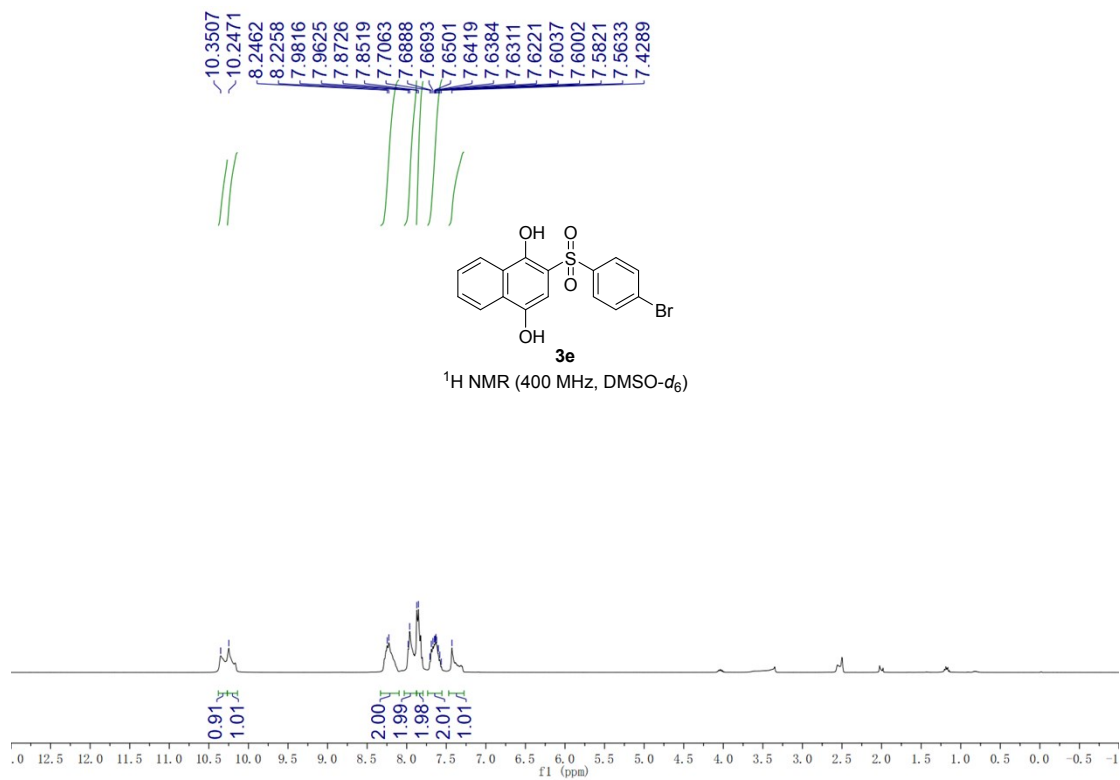

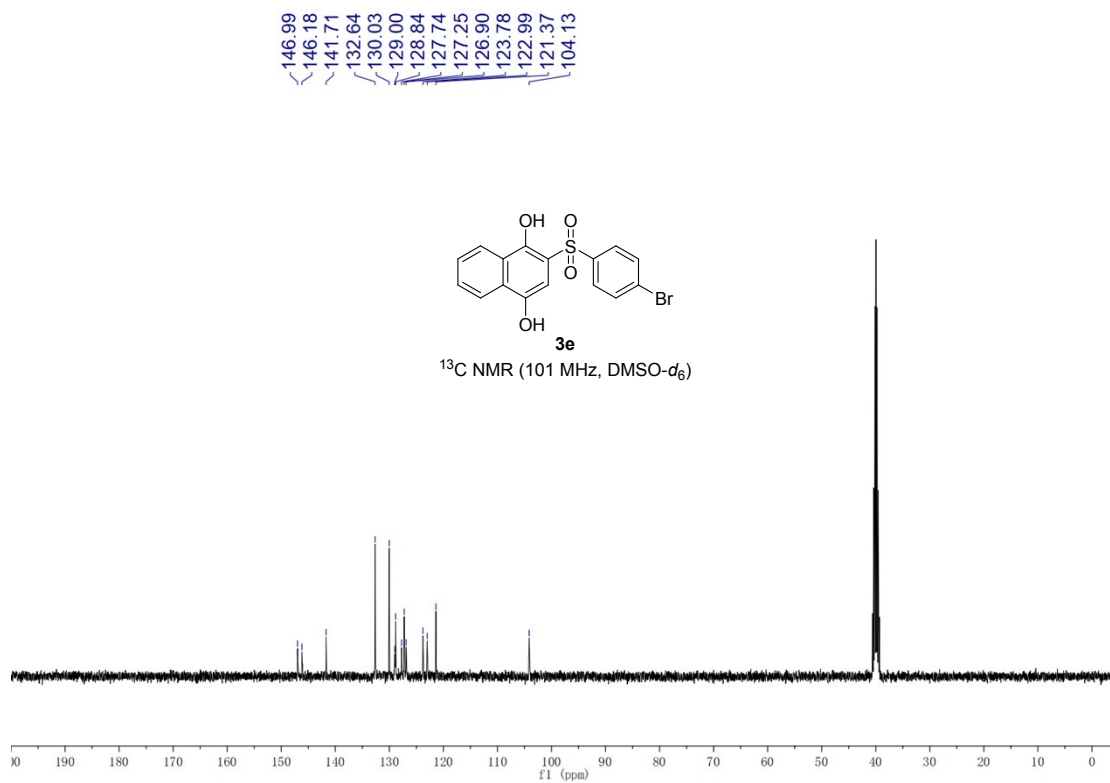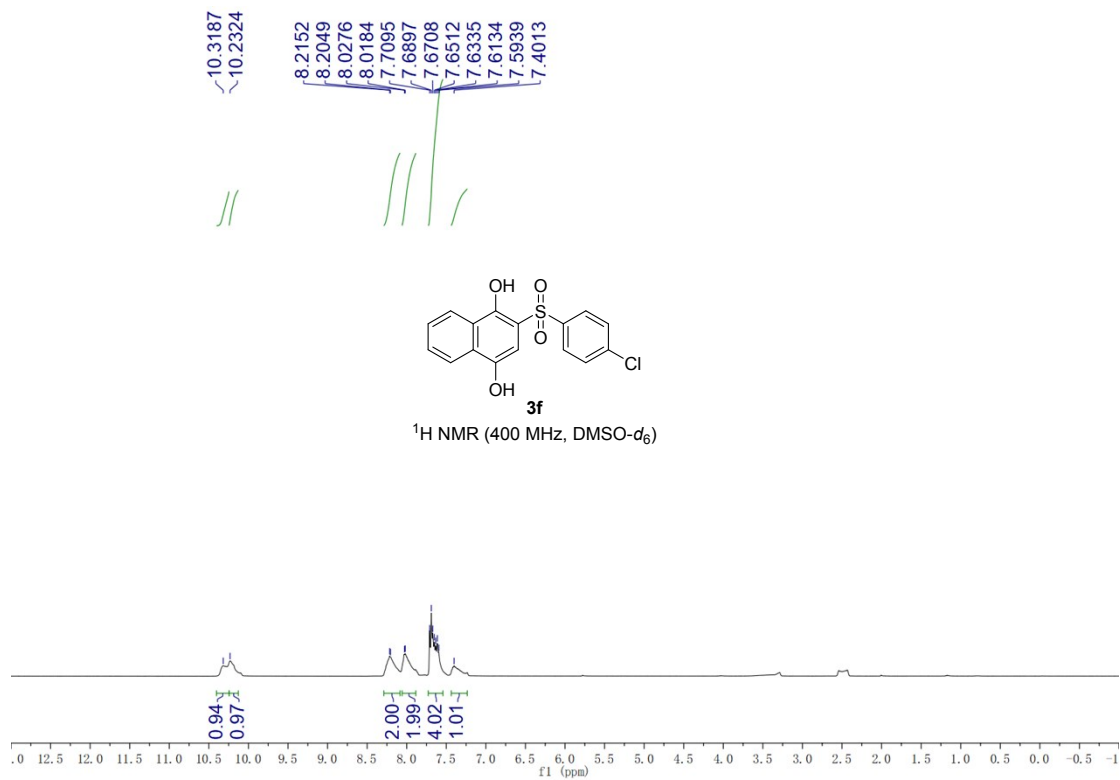

146.97  
146.14  
141.28  
138.67  
129.97  
129.70  
128.99  
128.84  
127.25  
126.90  
123.77  
122.98  
121.41  
104.13

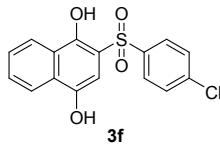

<sup>13</sup>C NMR (101 MHz, DMSO-d<sub>6</sub>)

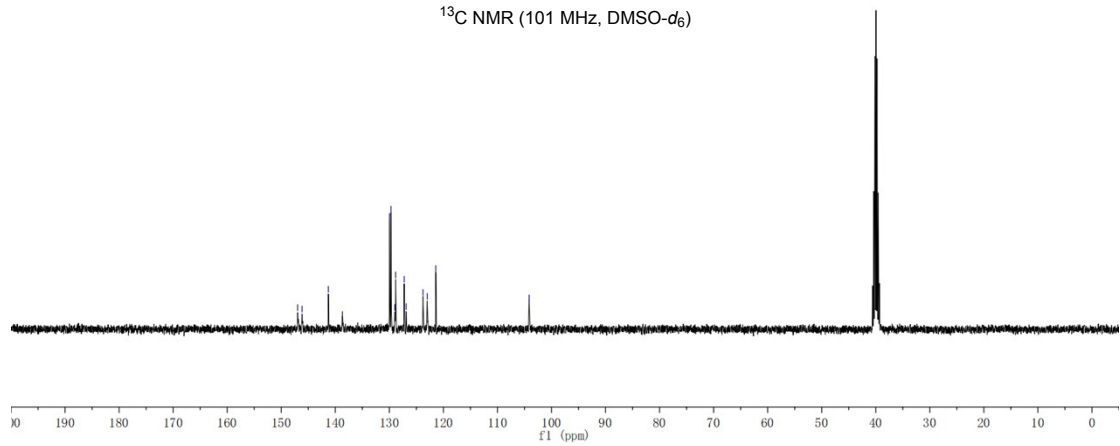

10.2417  
10.1368  
8.2033  
8.1828  
8.1558  
8.1356  
8.0553  
8.0422  
8.0331  
8.0201  
7.6642  
7.6469  
7.6290  
7.6264  
7.6090  
7.6062  
7.5884  
7.5711  
7.5686  
7.4721  
7.4500  
7.4279  
7.3124

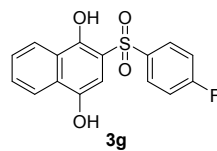

<sup>1</sup>H NMR (400 MHz, DMSO-d<sub>6</sub>)

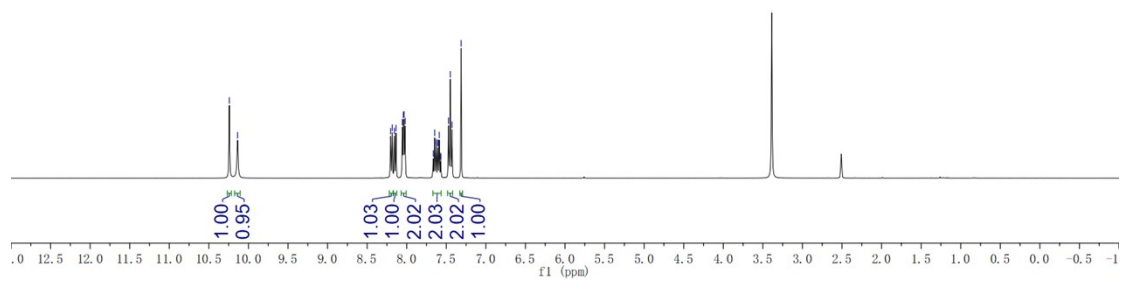

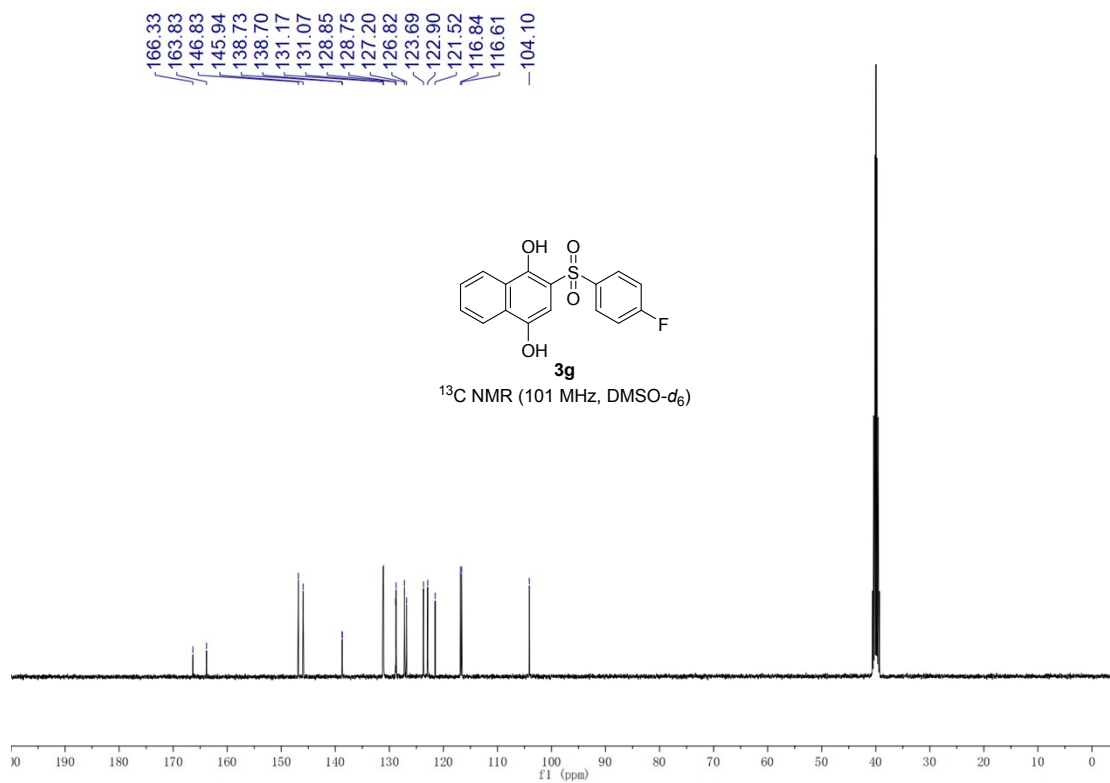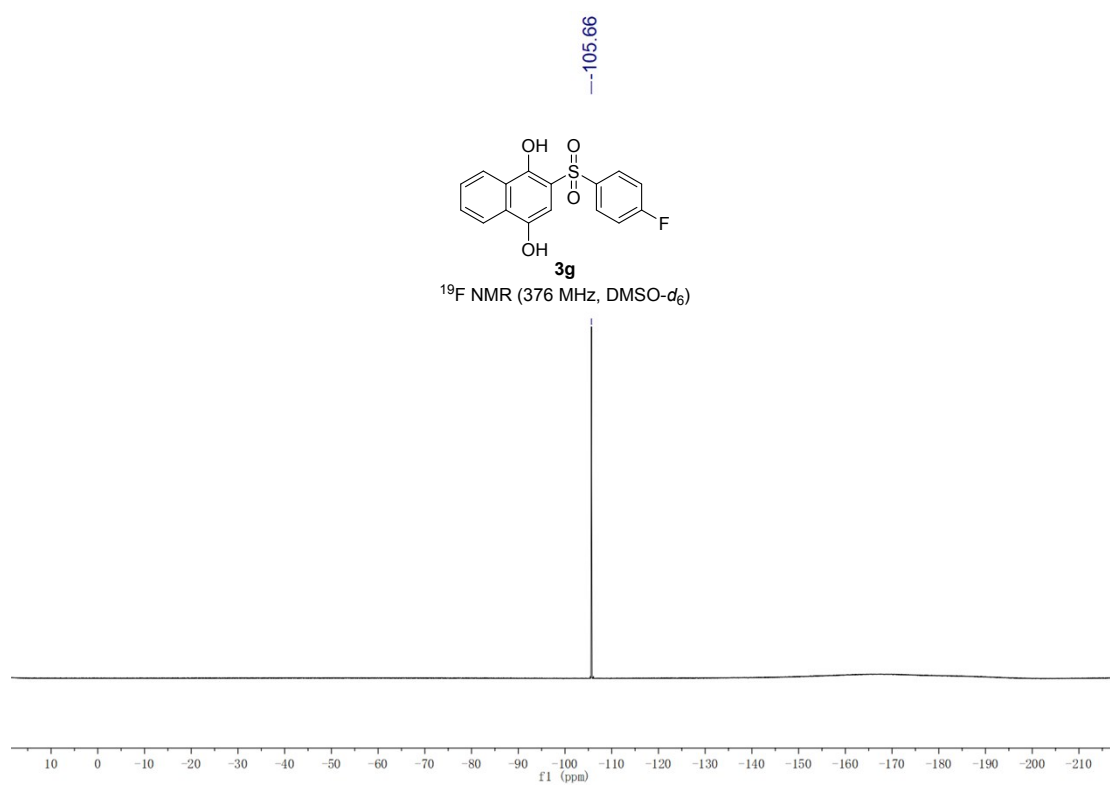

10.2474  
10.1192  
8.1891  
8.1681  
8.1535  
8.1291  
7.7606  
7.7568  
7.7410  
7.7387  
7.7250  
7.7089  
7.7052  
7.6700  
7.6528  
7.6323  
7.5990  
7.5803  
7.5630  
7.5143  
7.4954  
7.4759  
7.3608  
7.3315  
7.3143

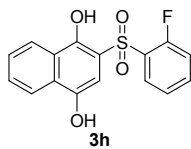

<sup>1</sup>H NMR (400 MHz, DMSO-*d*<sub>6</sub>)

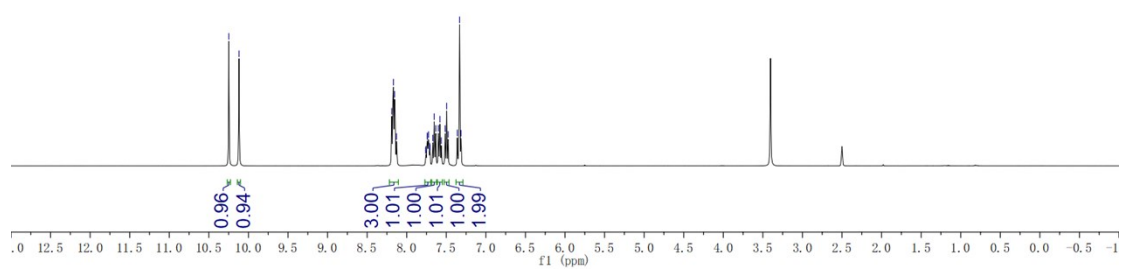

159.71  
157.19  
146.15  
145.90  
136.24  
136.15  
130.43  
129.66  
129.52  
128.56  
128.42  
128.75  
126.17  
124.82  
124.79  
123.27  
122.51  
120.83  
117.25  
117.04  
103.84

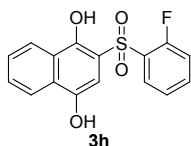

<sup>13</sup>C NMR (101 MHz, DMSO-*d*<sub>6</sub>)

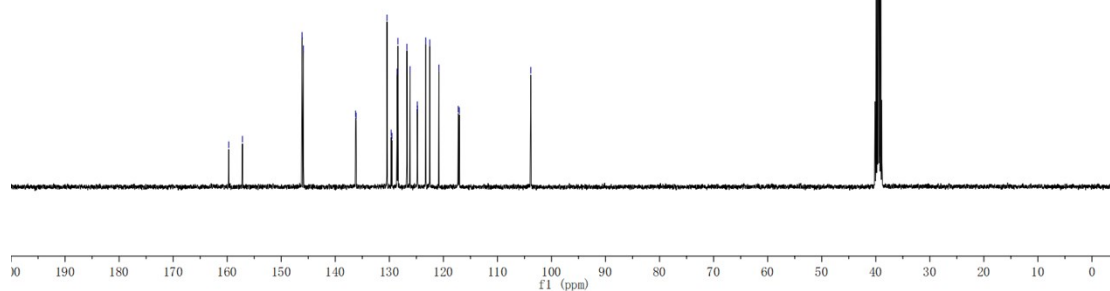

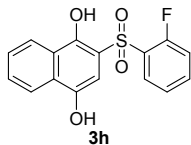

<sup>19</sup>F NMR (376 MHz, DMSO-*d*<sub>6</sub>)

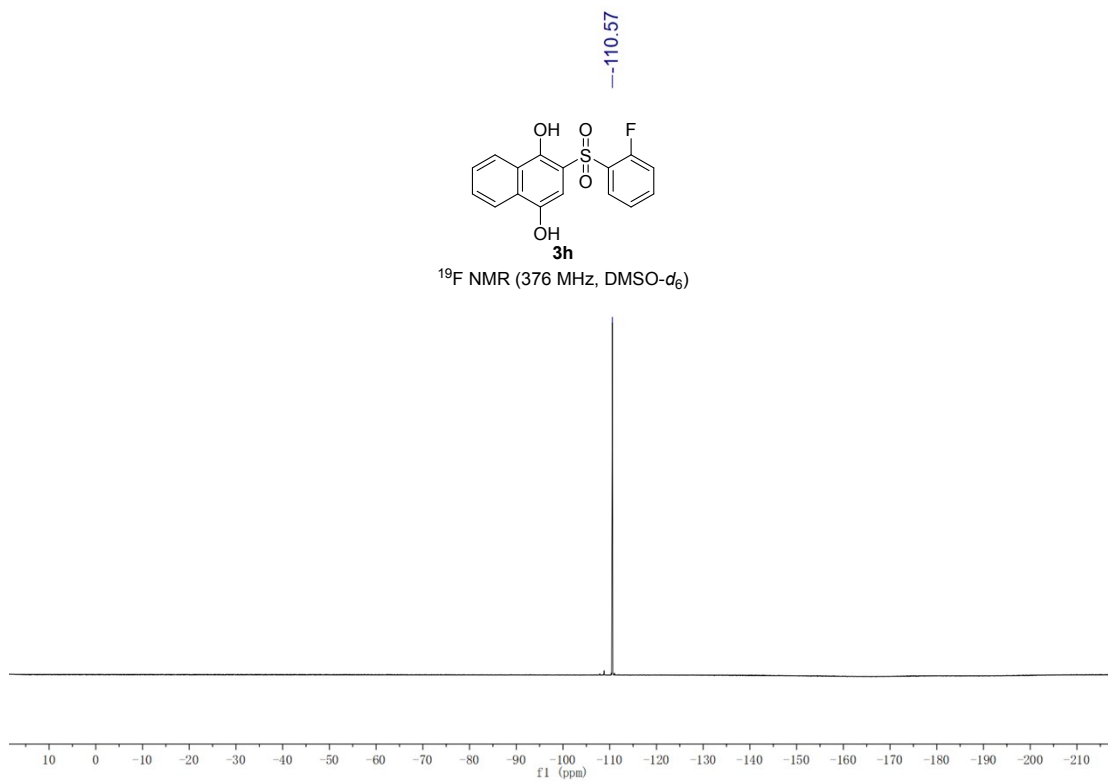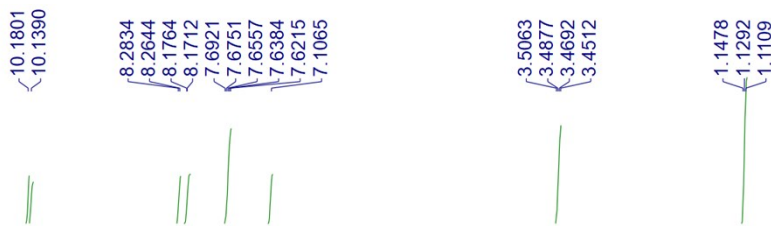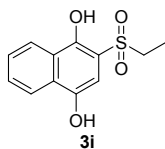

<sup>1</sup>H NMR (400 MHz, DMSO-*d*<sub>6</sub>)

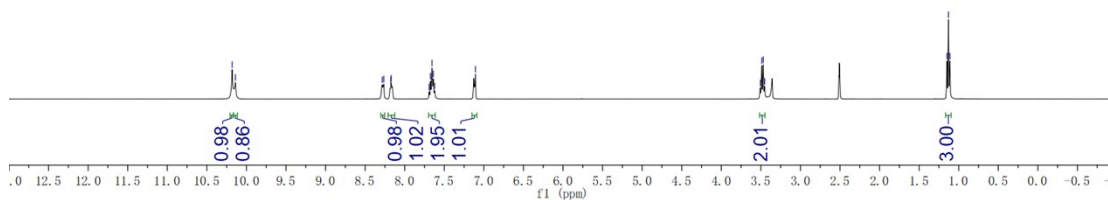

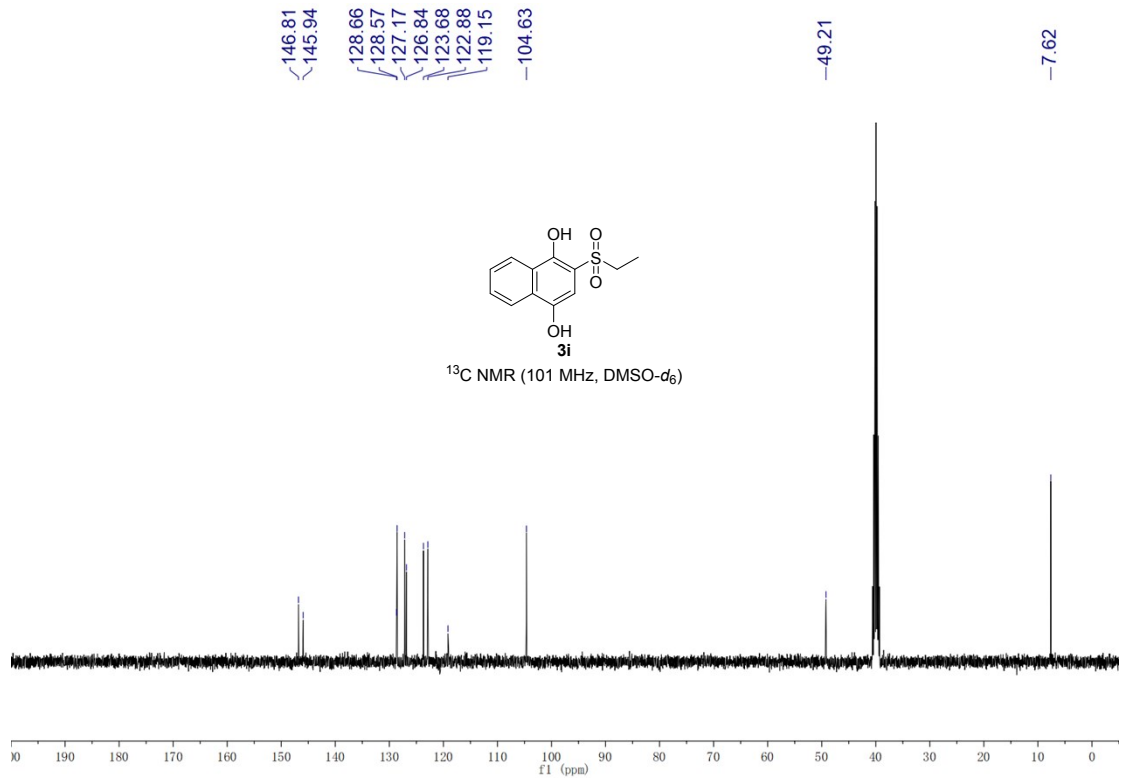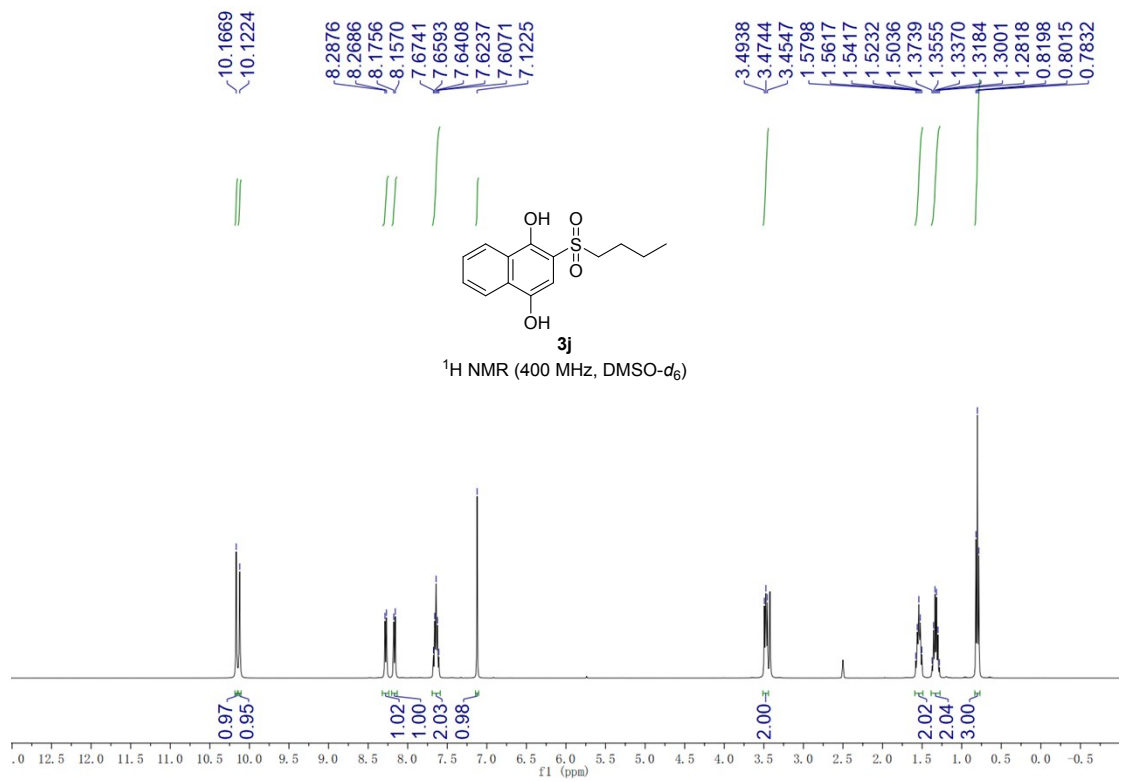

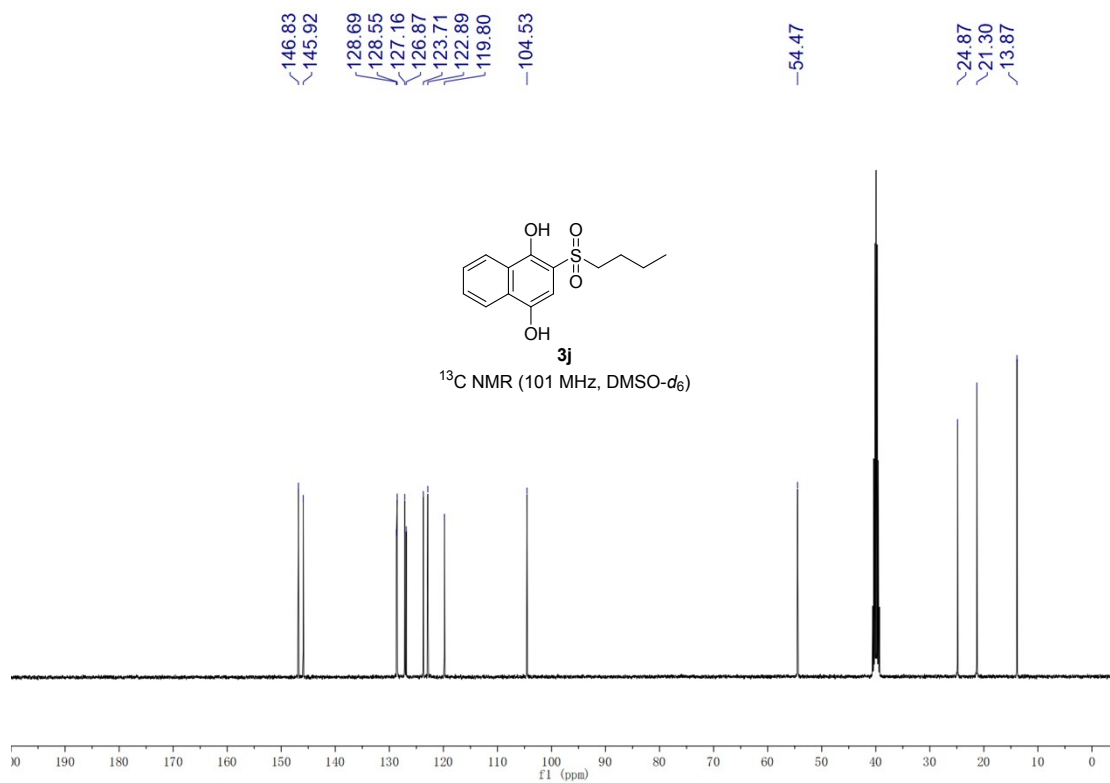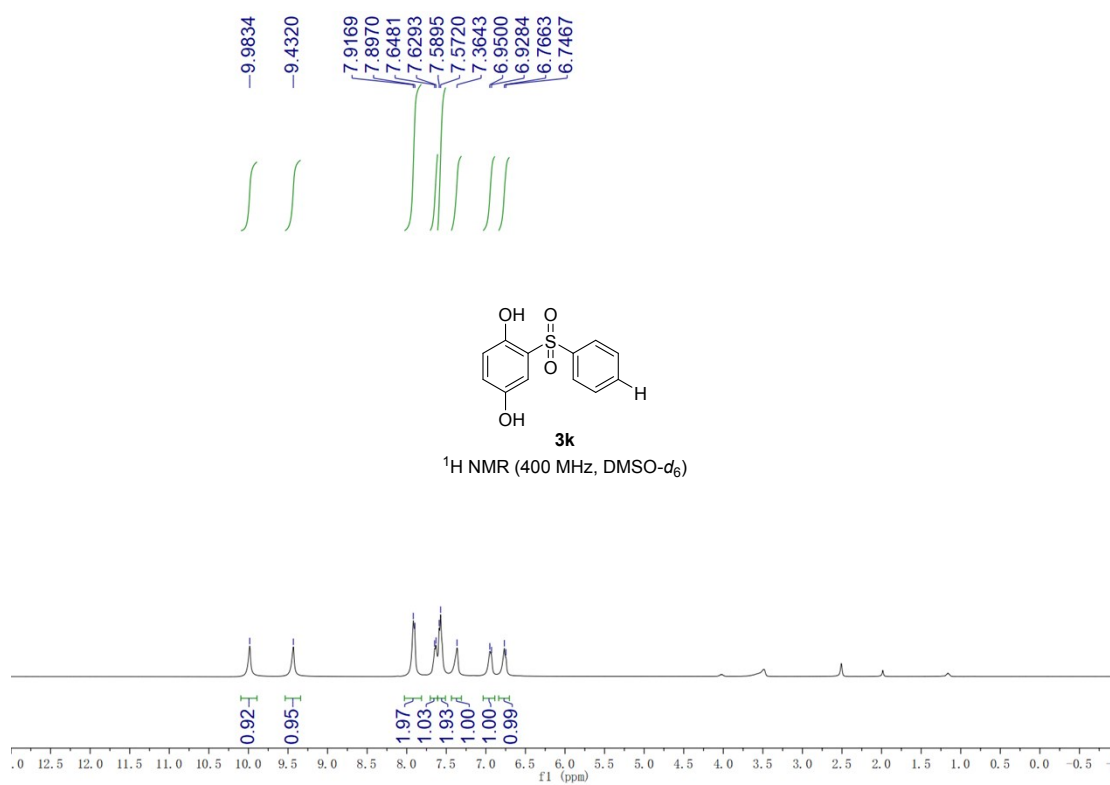



149.96  
148.69  
141.81  
133.55  
129.27  
128.25  
126.46  
123.40  
119.02  
114.31

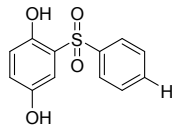

**3k**

<sup>13</sup>C NMR (101 MHz, DMSO-d<sub>6</sub>)

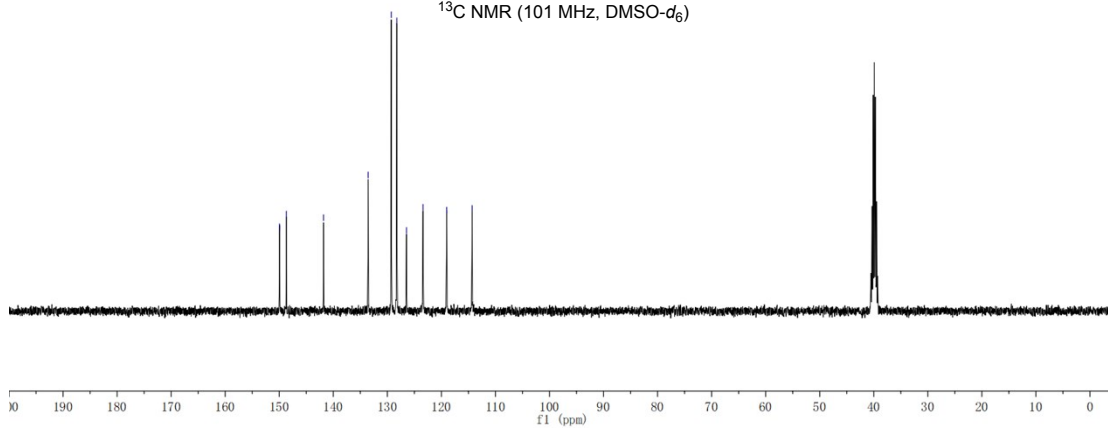

9.9062  
9.3853  
7.7866  
7.7659  
7.3807  
7.3606  
7.3256  
7.3179  
6.9217  
6.9142  
6.8999  
6.8923  
6.7410  
6.7191  
2.3625

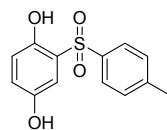

**3l**

<sup>1</sup>H NMR (400 MHz, DMSO-d<sub>6</sub>)

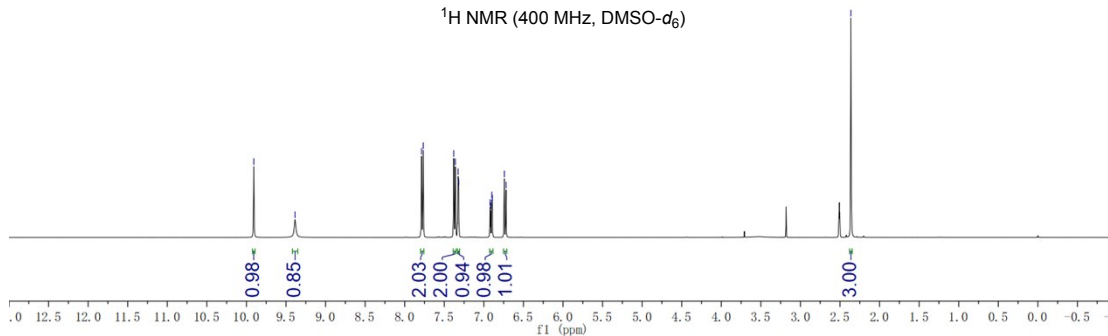

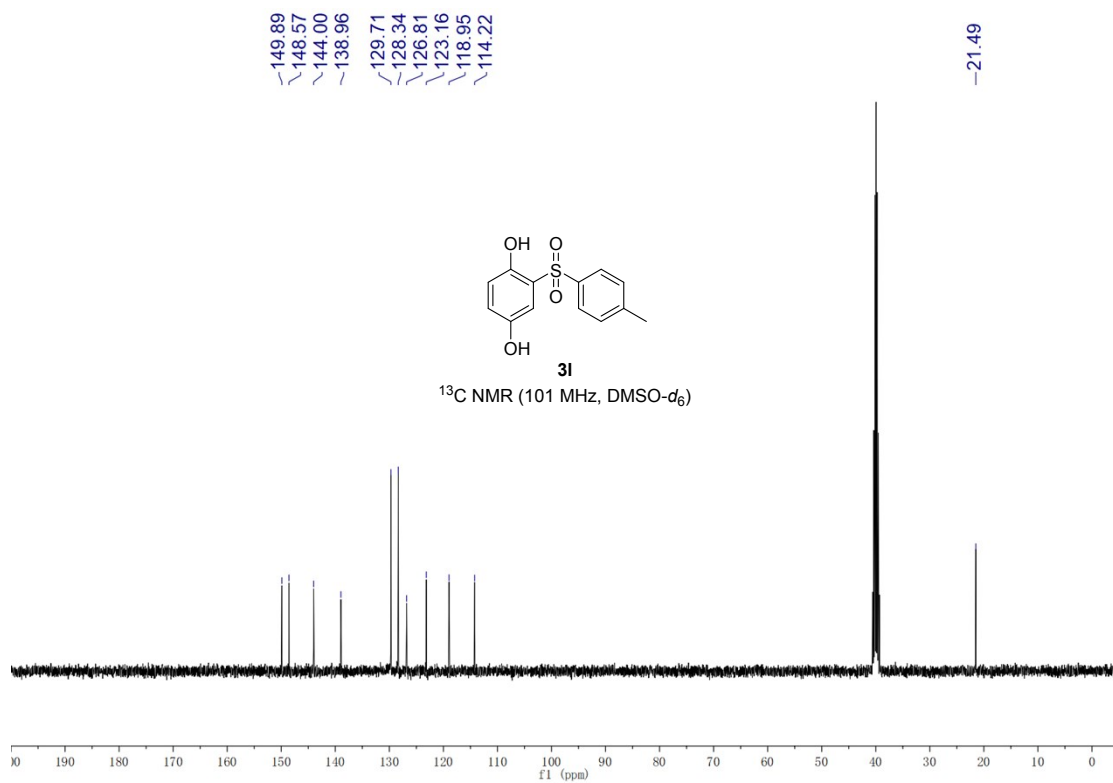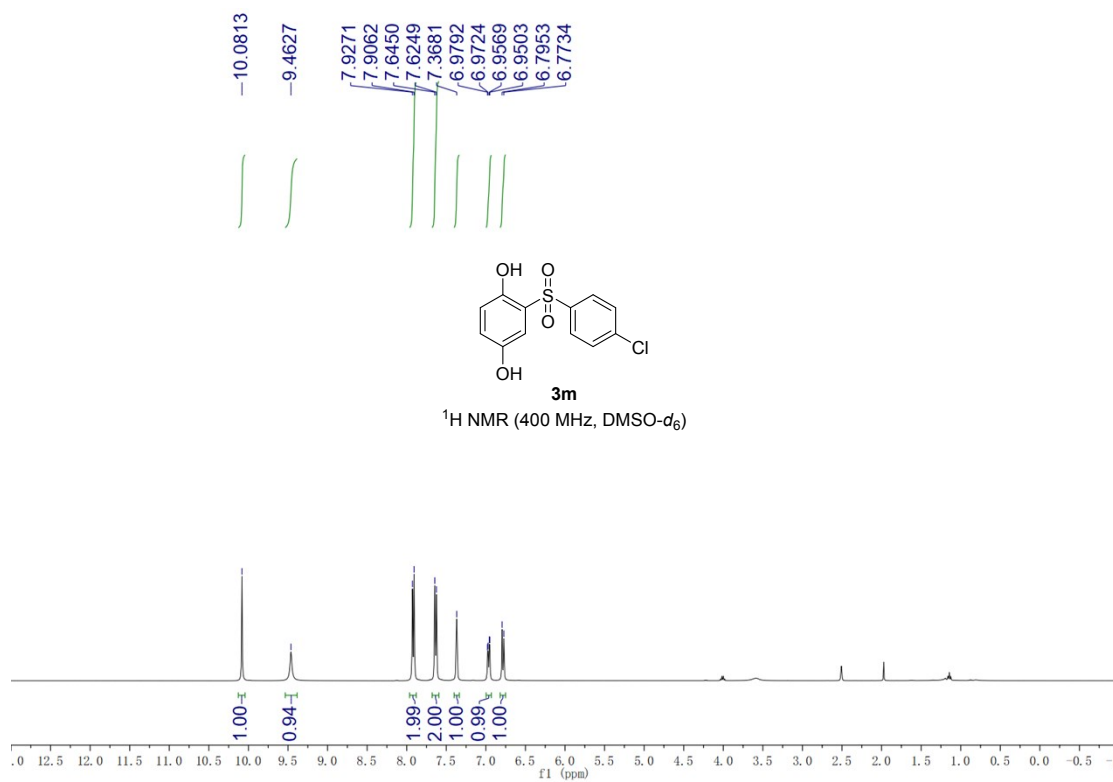

~149.69  
 ~148.34  
 ~140.24  
 ~138.31  
 ~129.94  
 ~129.07  
 ~125.74  
 ~123.34  
 ~118.73  
 ~113.87

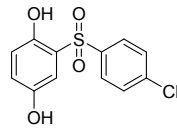

**3m**

<sup>13</sup>C NMR (101 MHz, DMSO-d<sub>6</sub>)

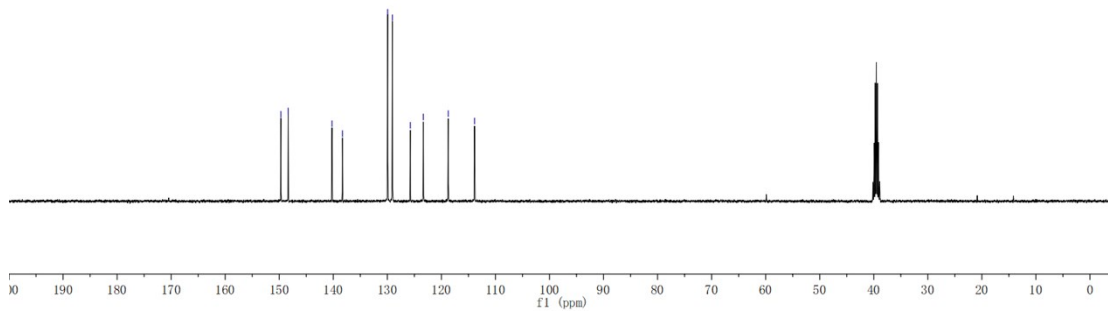

-9.9846  
 -9.4730  
 -8.0422  
 -8.0276  
 -8.0231  
 -8.0085  
 -8.0040  
 -7.7597  
 -7.7552  
 -7.7471  
 -7.7413  
 -7.7360  
 -7.7274  
 -7.7216  
 -7.7156  
 -7.7077  
 -7.7031  
 -7.4722  
 -7.4533  
 -7.4340  
 -7.3642  
 -7.3432  
 -7.3365  
 -7.3171  
 -6.9655  
 -6.9579  
 -6.9436  
 -6.9361  
 -6.7407  
 -6.7188

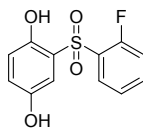

**3n**

<sup>1</sup>H NMR (400 MHz, DMSO-d<sub>6</sub>)

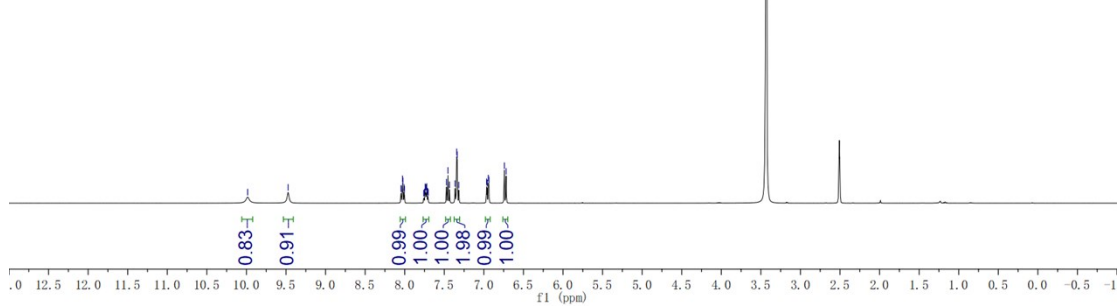

160.10  
157.58  
149.83  
148.75  
136.60  
136.51  
131.39  
129.50  
129.36  
126.14  
125.03  
124.99  
123.77  
118.88  
117.49  
114.52

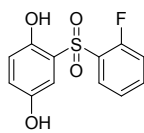

**3n**

<sup>13</sup>C NMR (101 MHz, DMSO-*d*<sub>6</sub>)

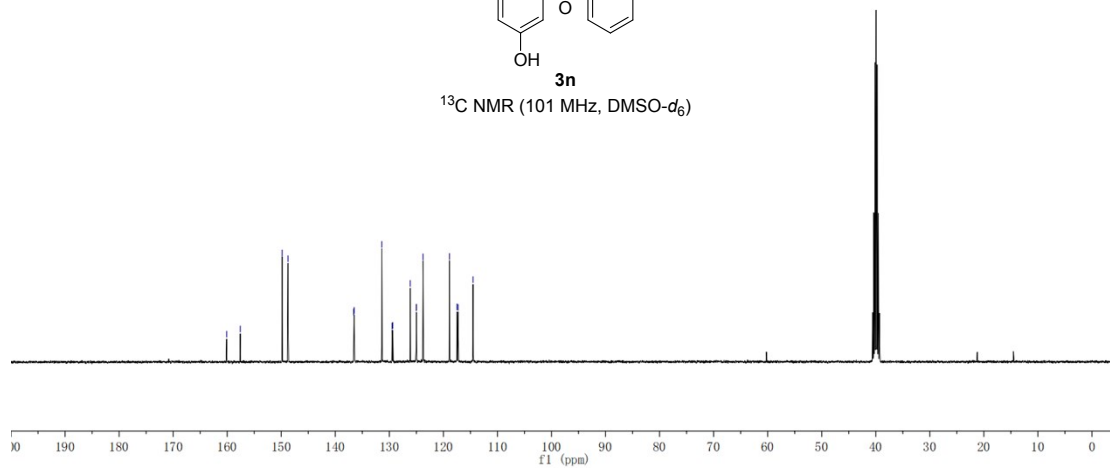

110.76

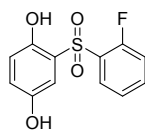

**3n**

<sup>19</sup>F NMR (376 MHz, DMSO-*d*<sub>6</sub>)

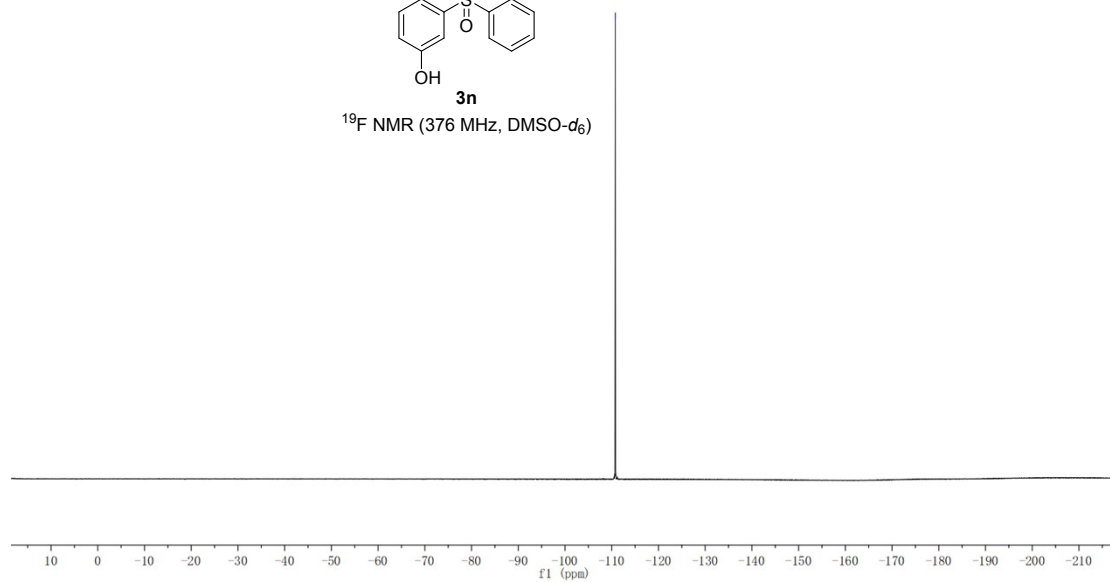

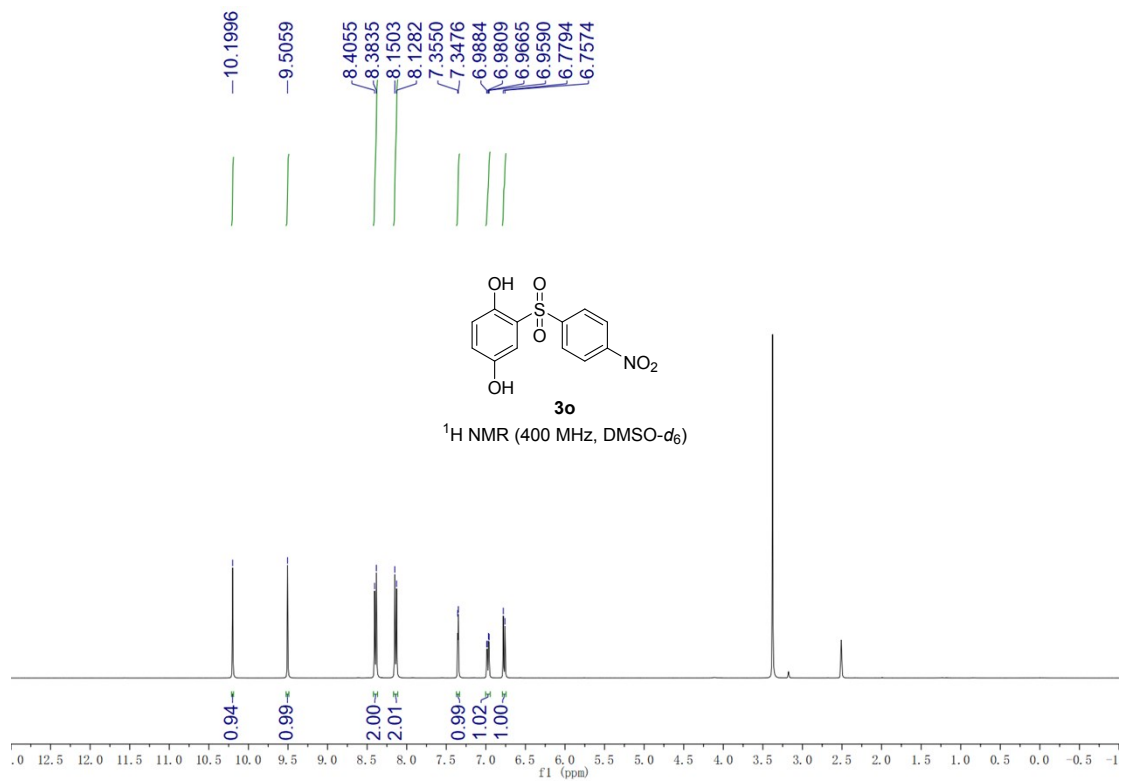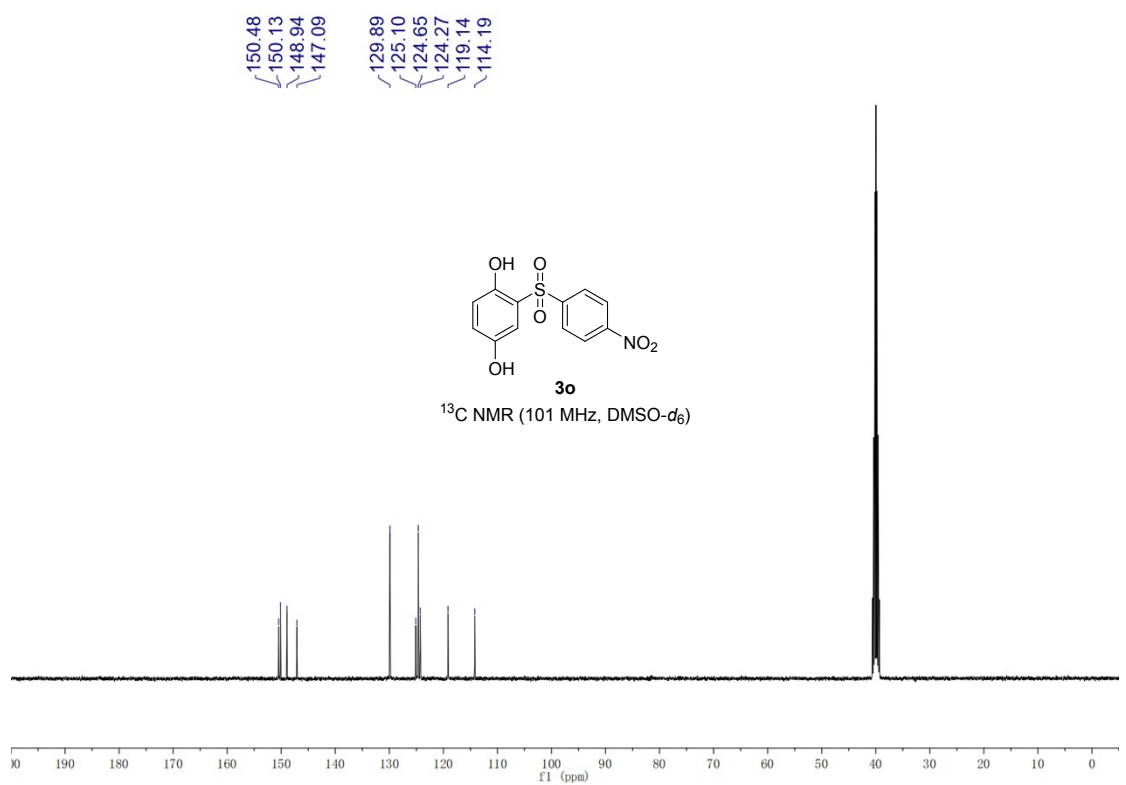

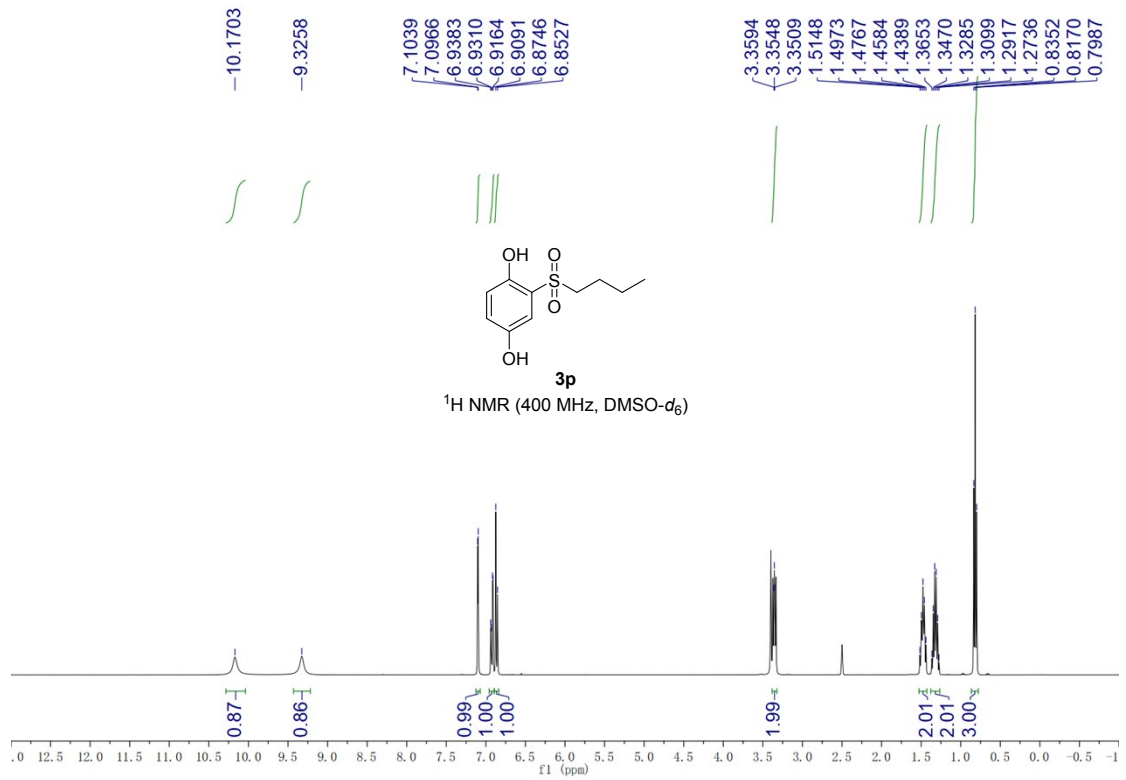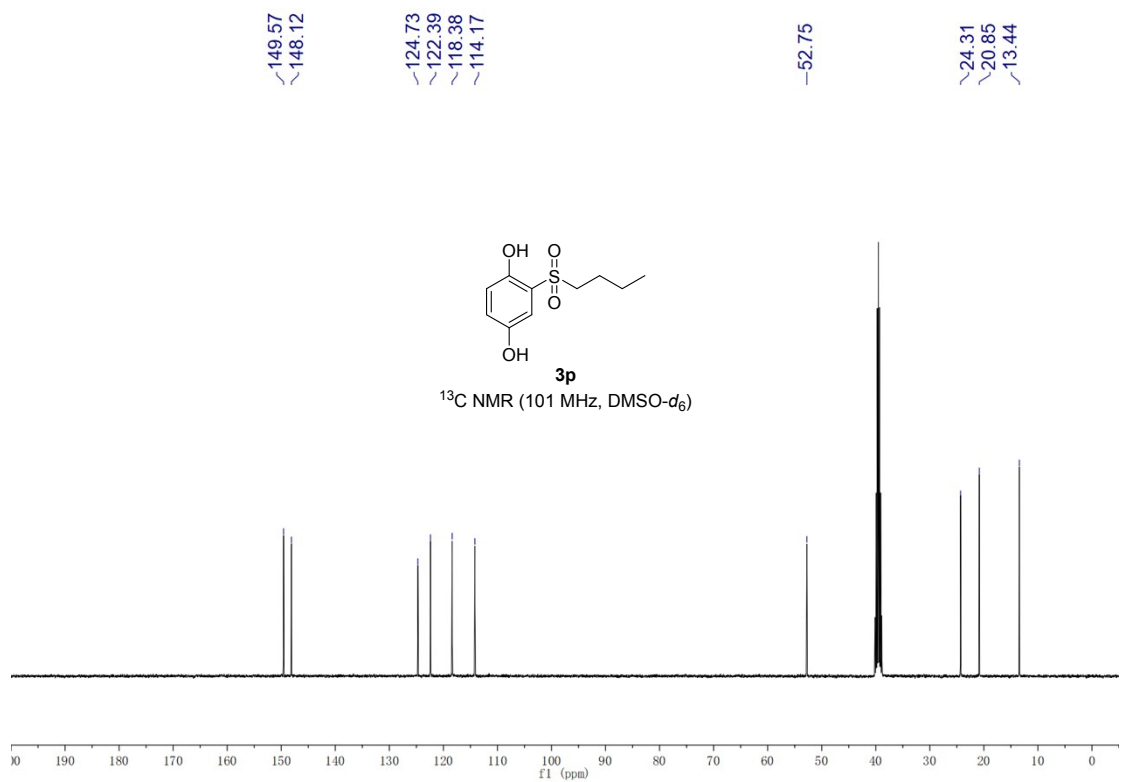

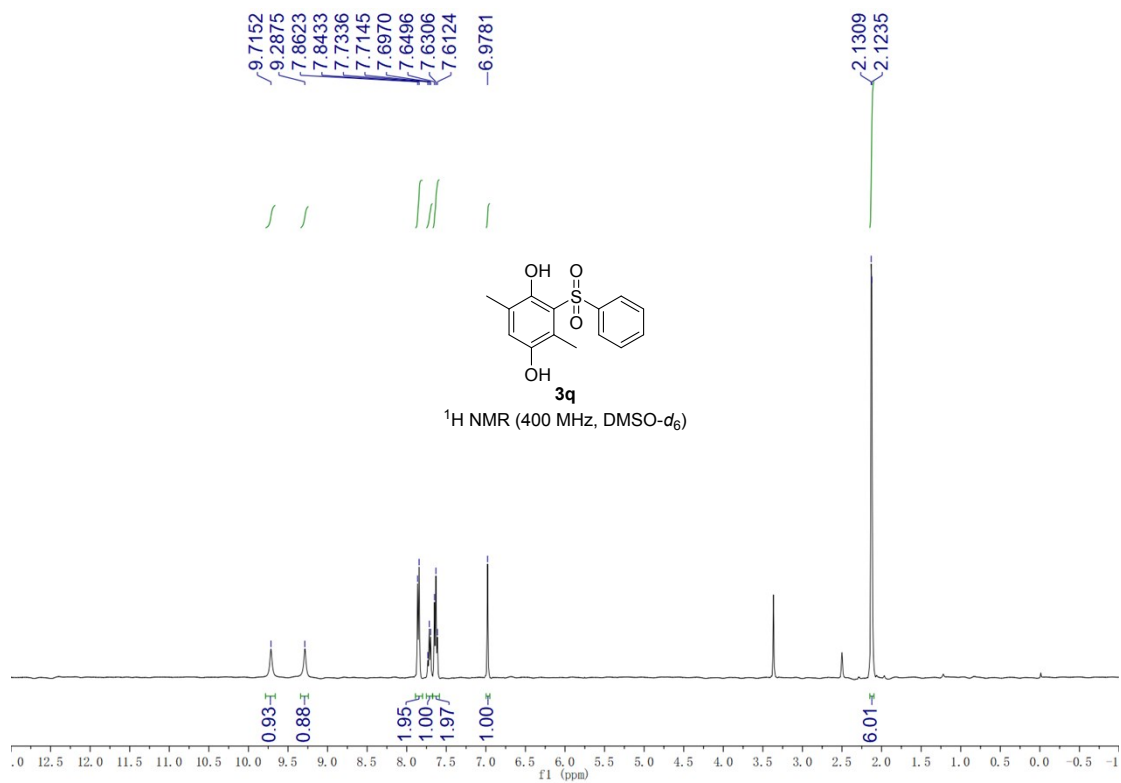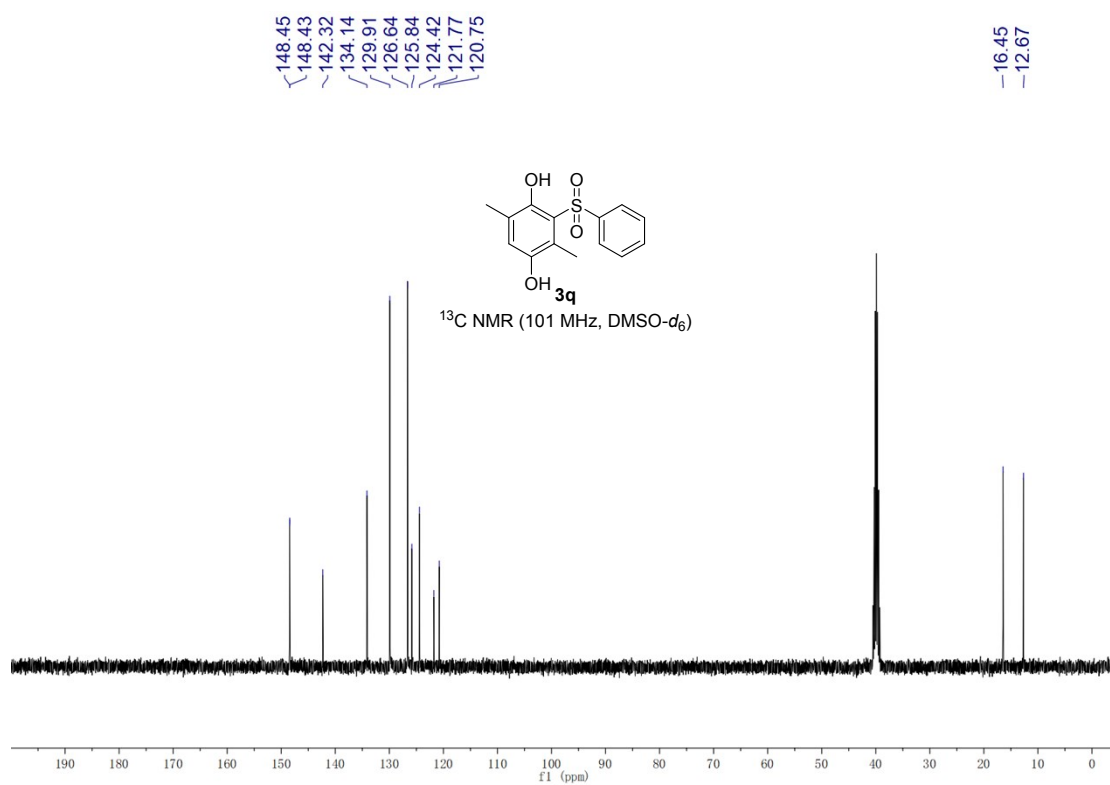

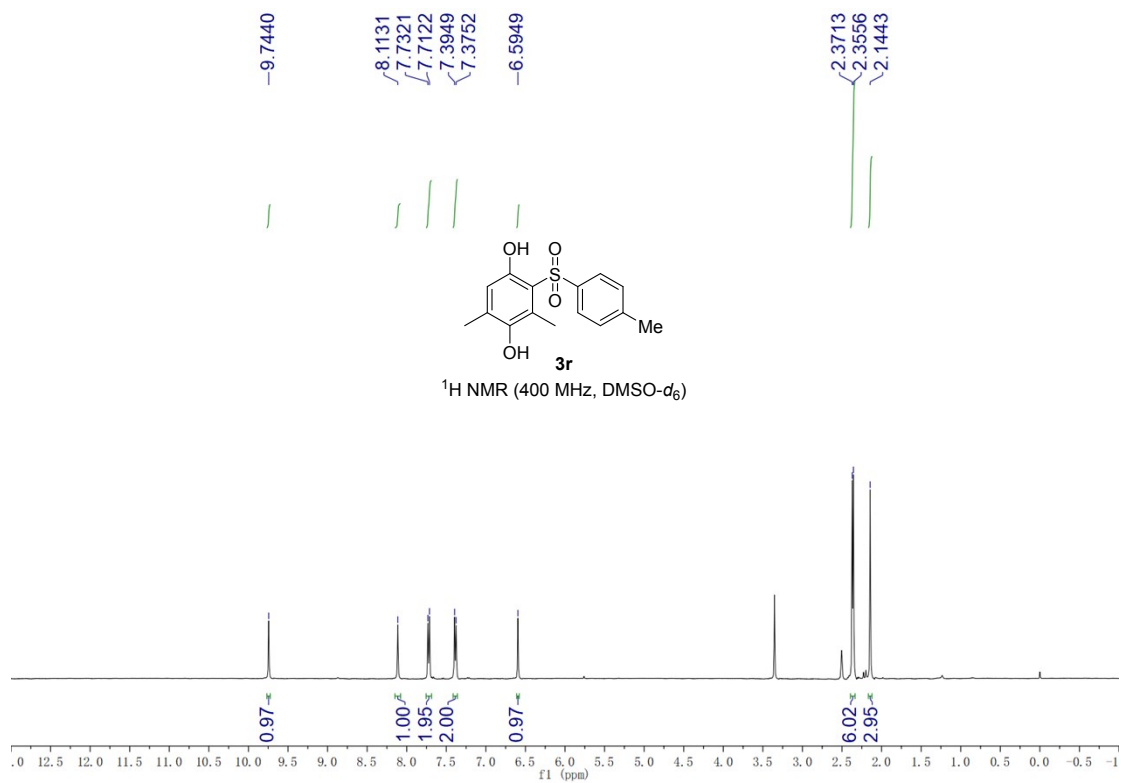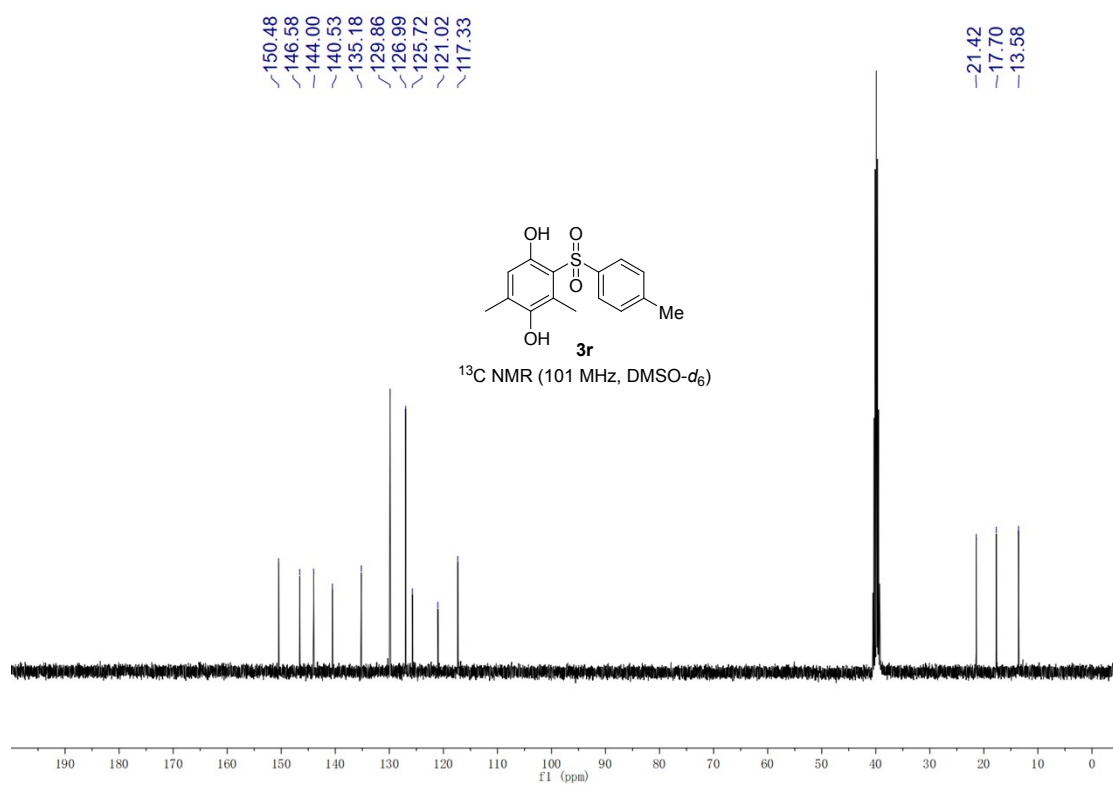



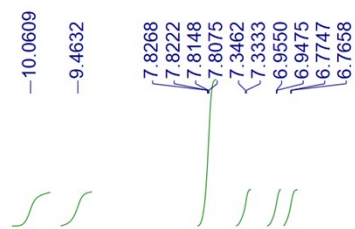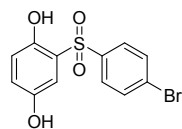

**3s**

<sup>1</sup>H NMR (400 MHz, DMSO-*d*<sub>6</sub>)

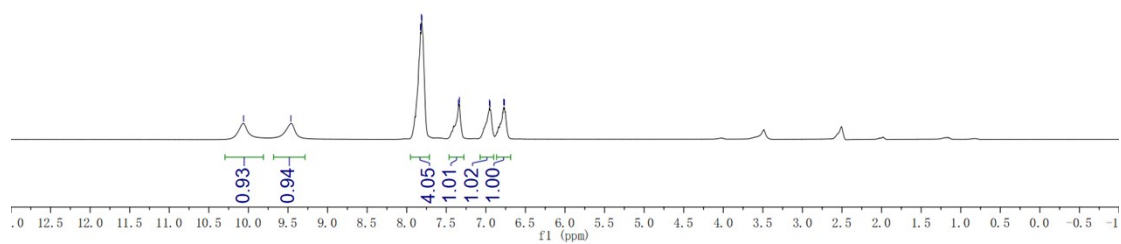

150.01  
148.68  
141.02  
132.39  
130.35  
127.66  
126.02  
123.68  
119.07  
114.16

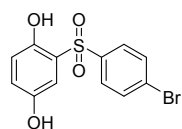

**3s**

<sup>13</sup>C NMR (101 MHz, DMSO-*d*<sub>6</sub>)

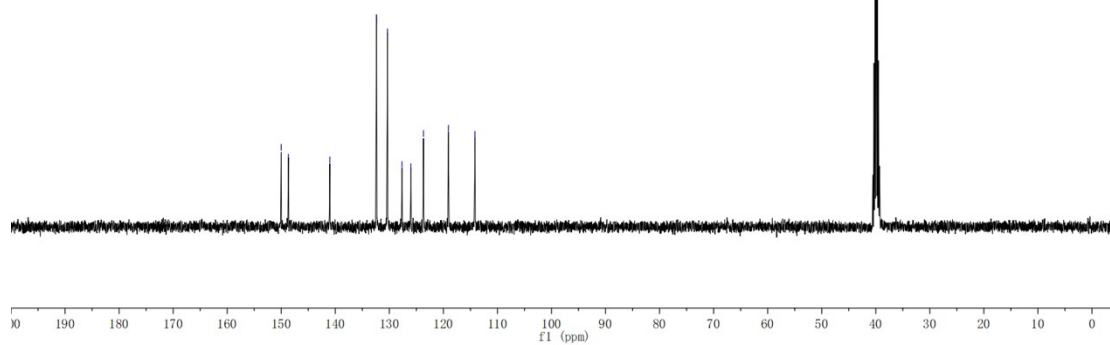

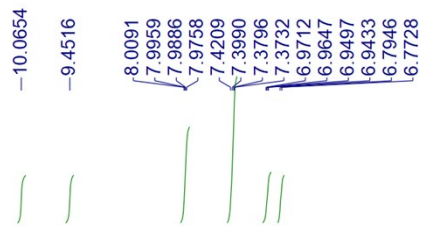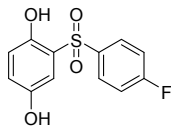

**3t**  
<sup>1</sup>H NMR (400 MHz, DMSO-*d*<sub>6</sub>)

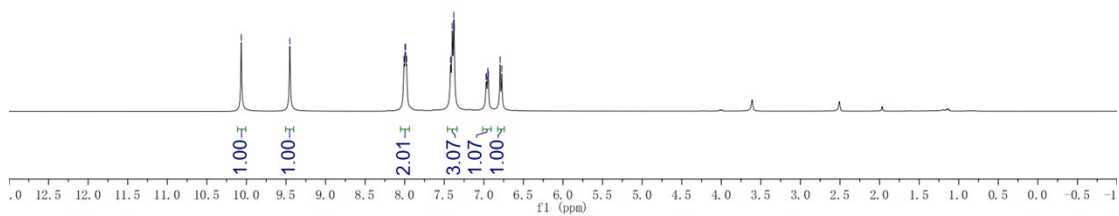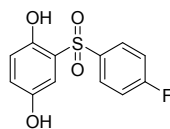

**3t**  
<sup>13</sup>C NMR (101 MHz, DMSO-*d*<sub>6</sub>)

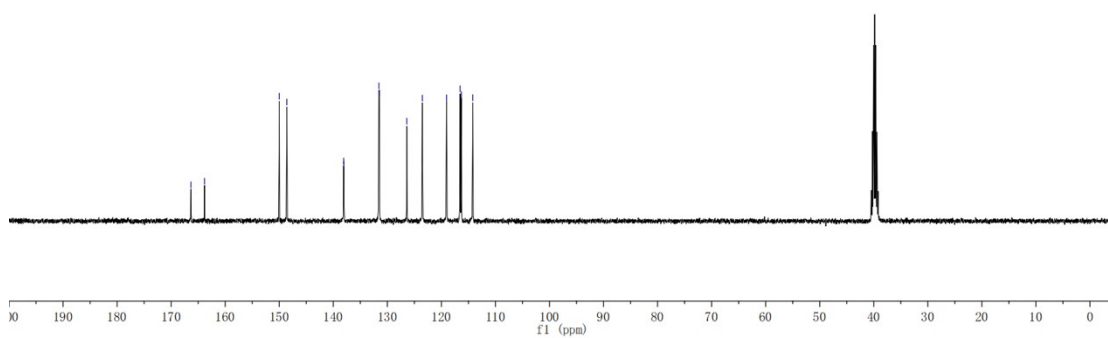

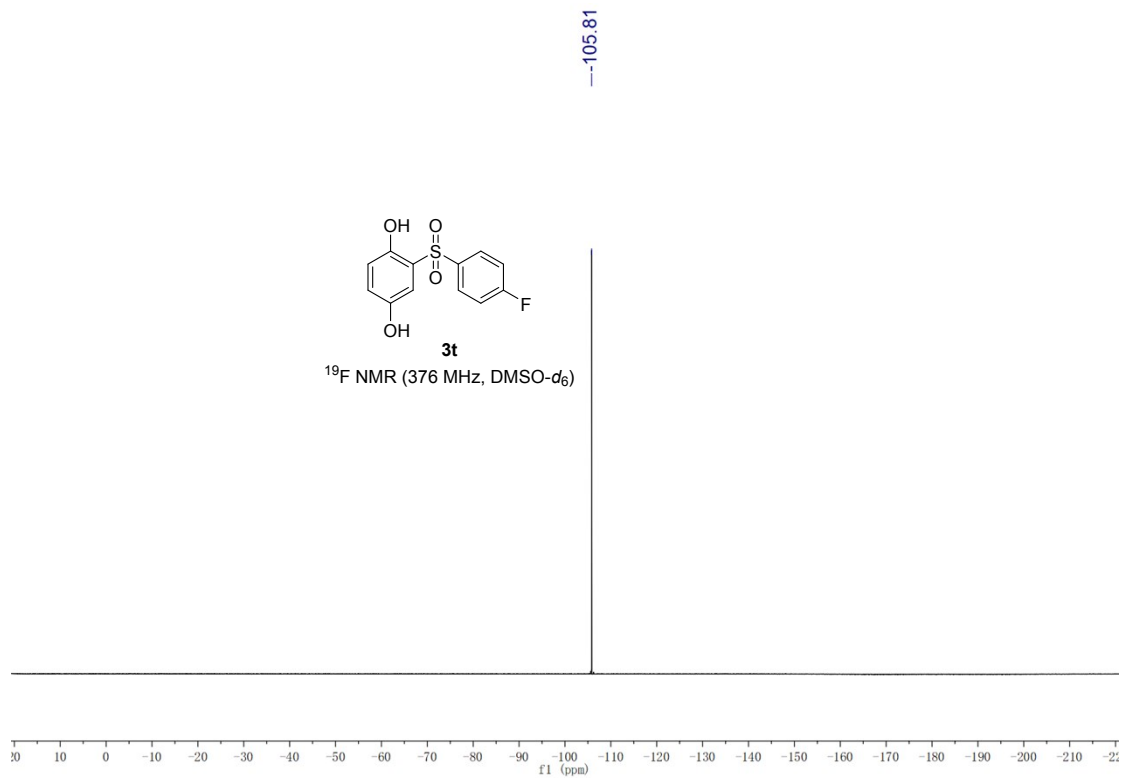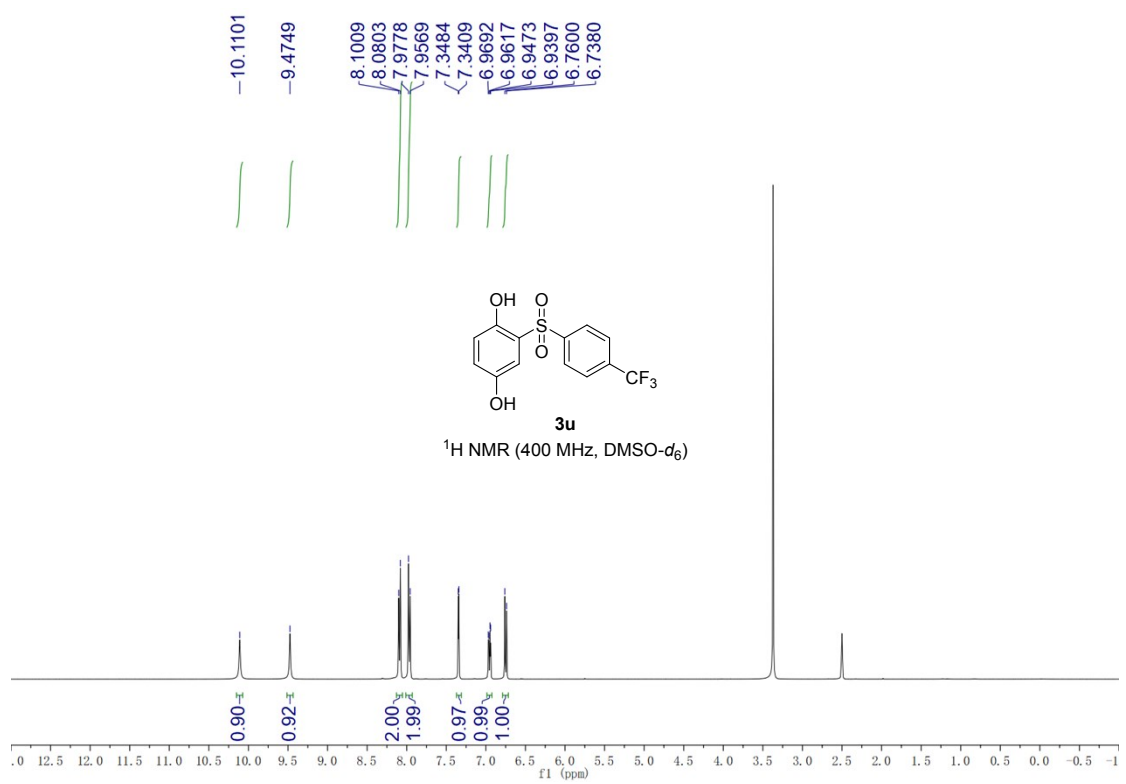

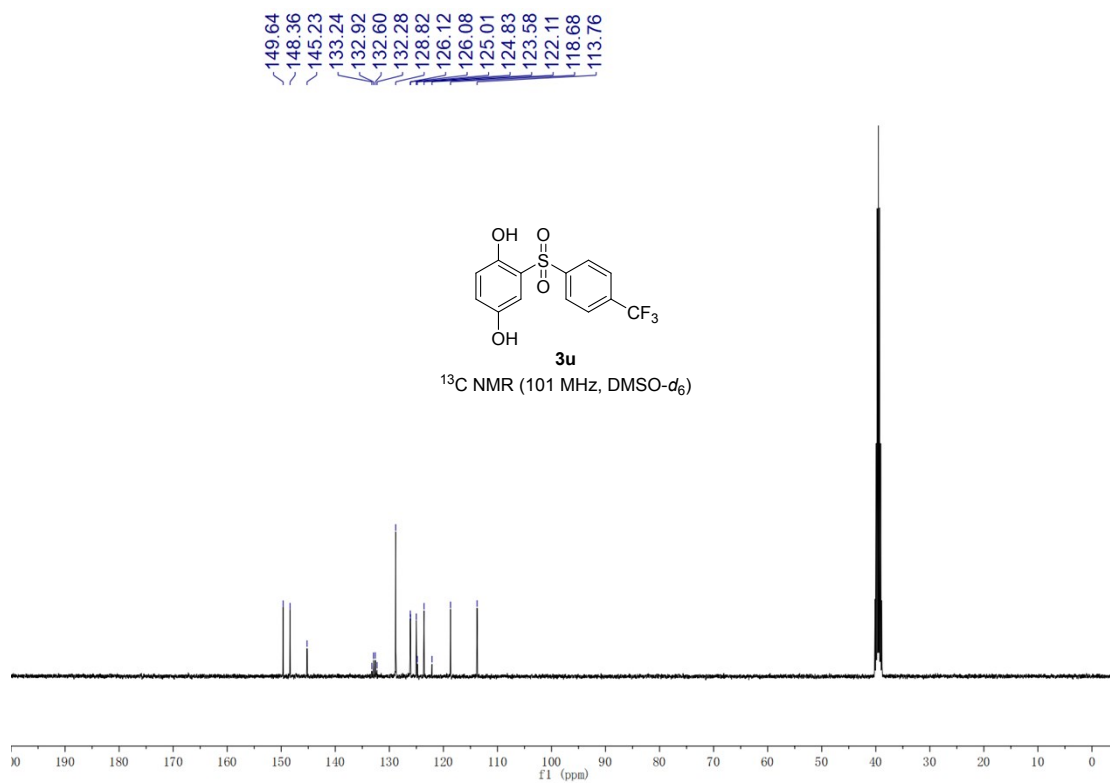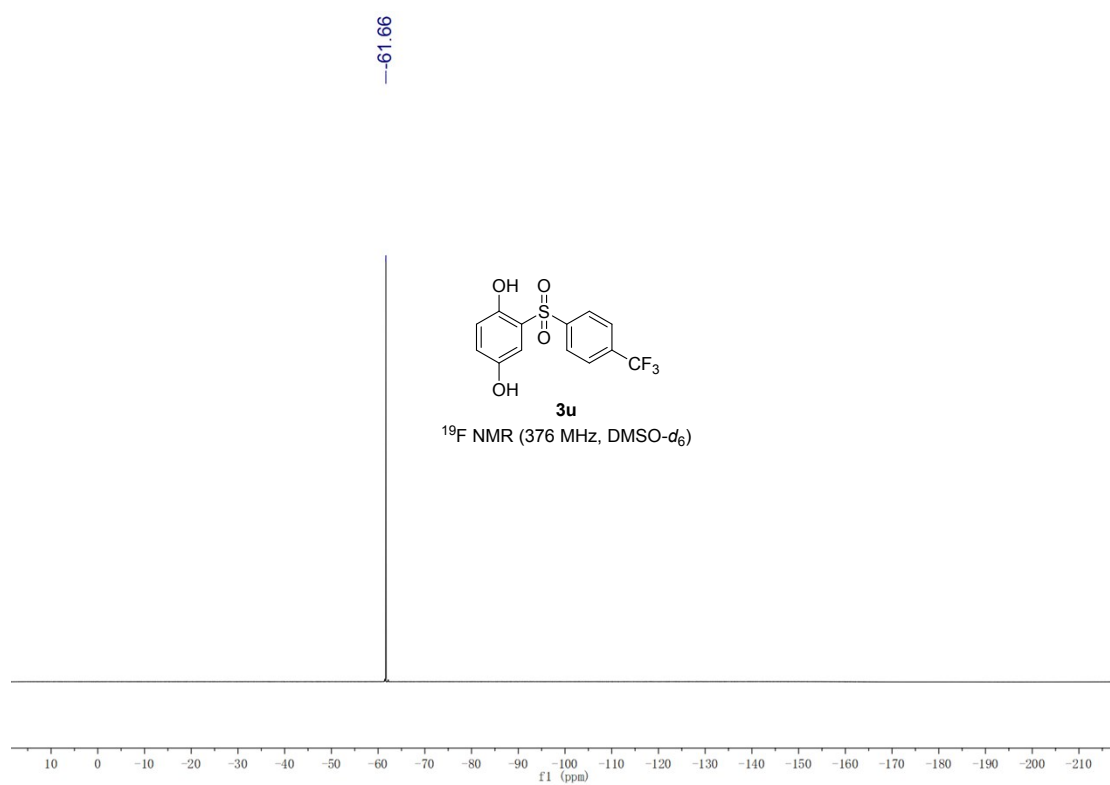

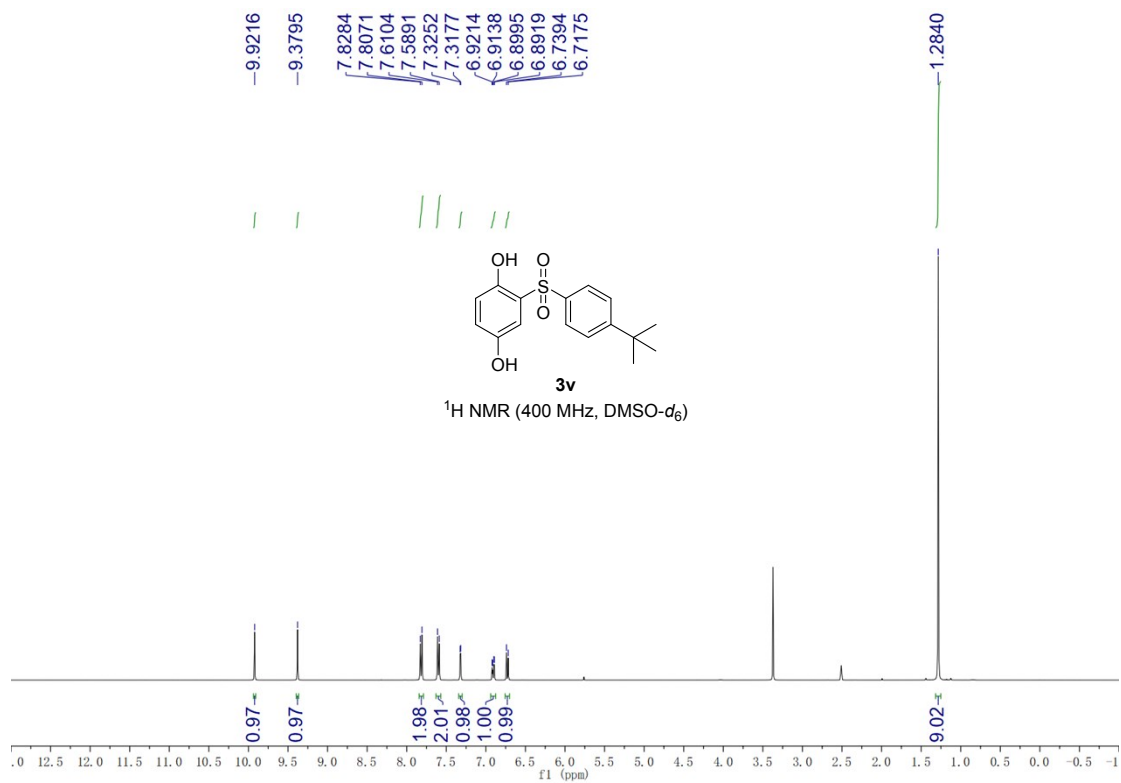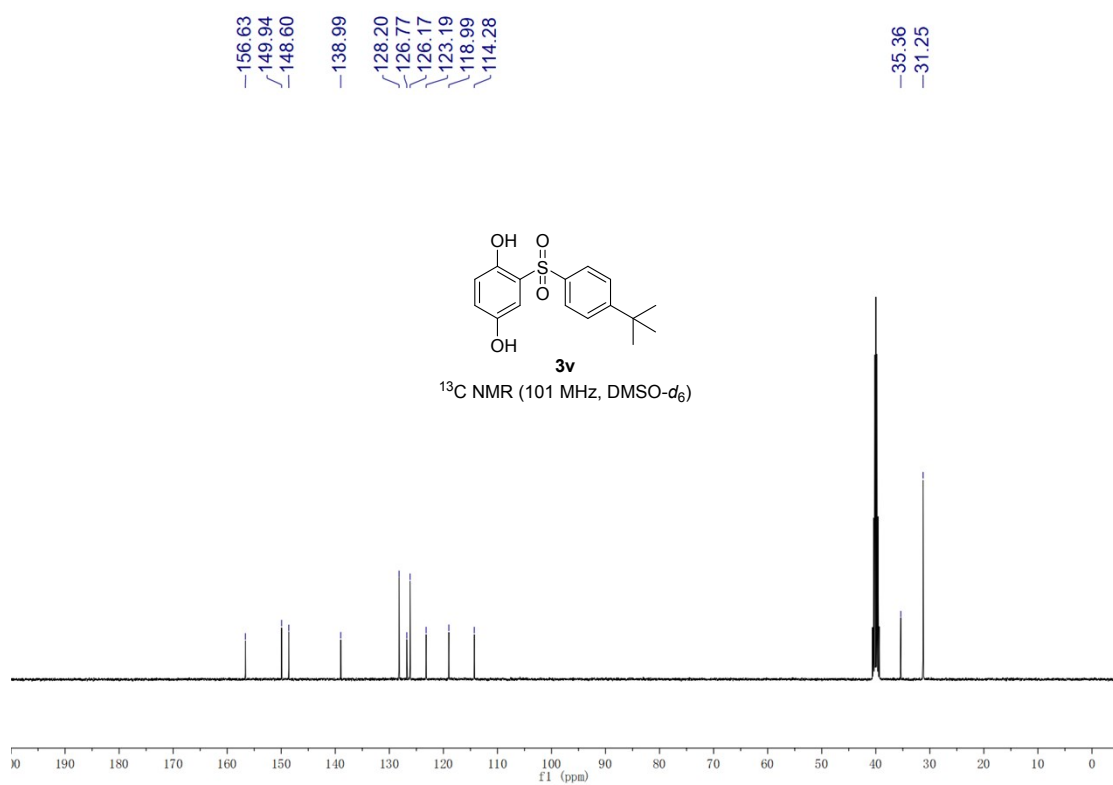

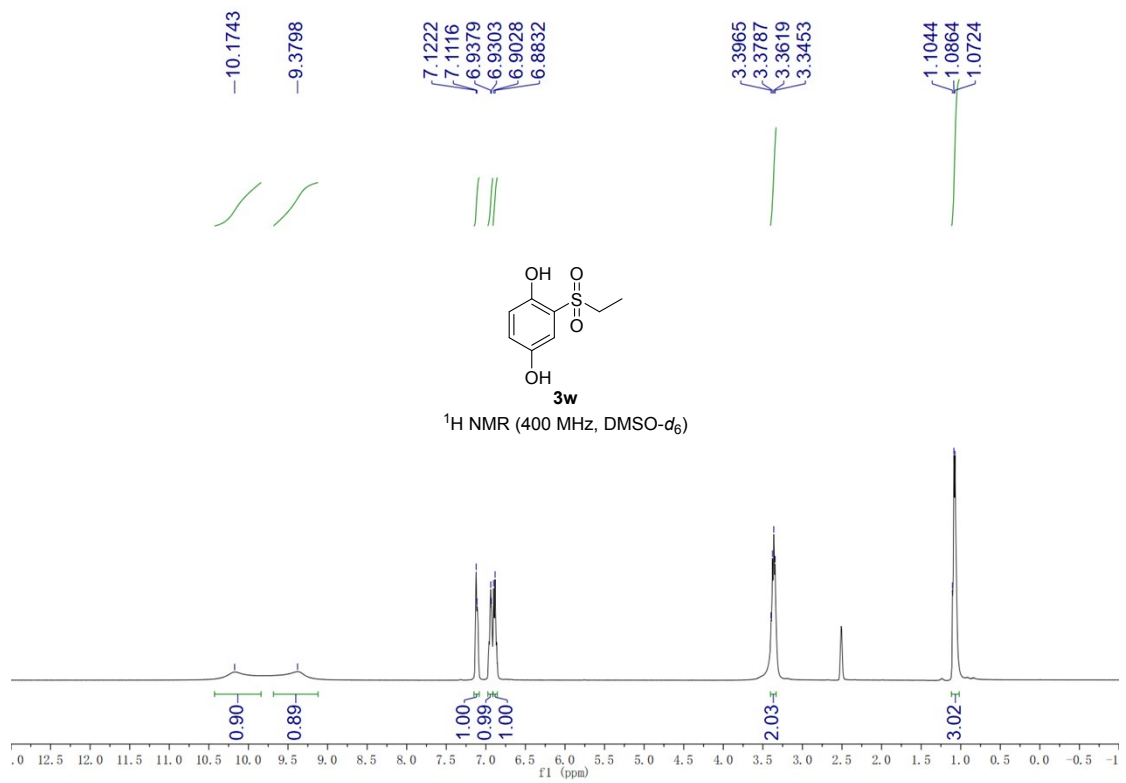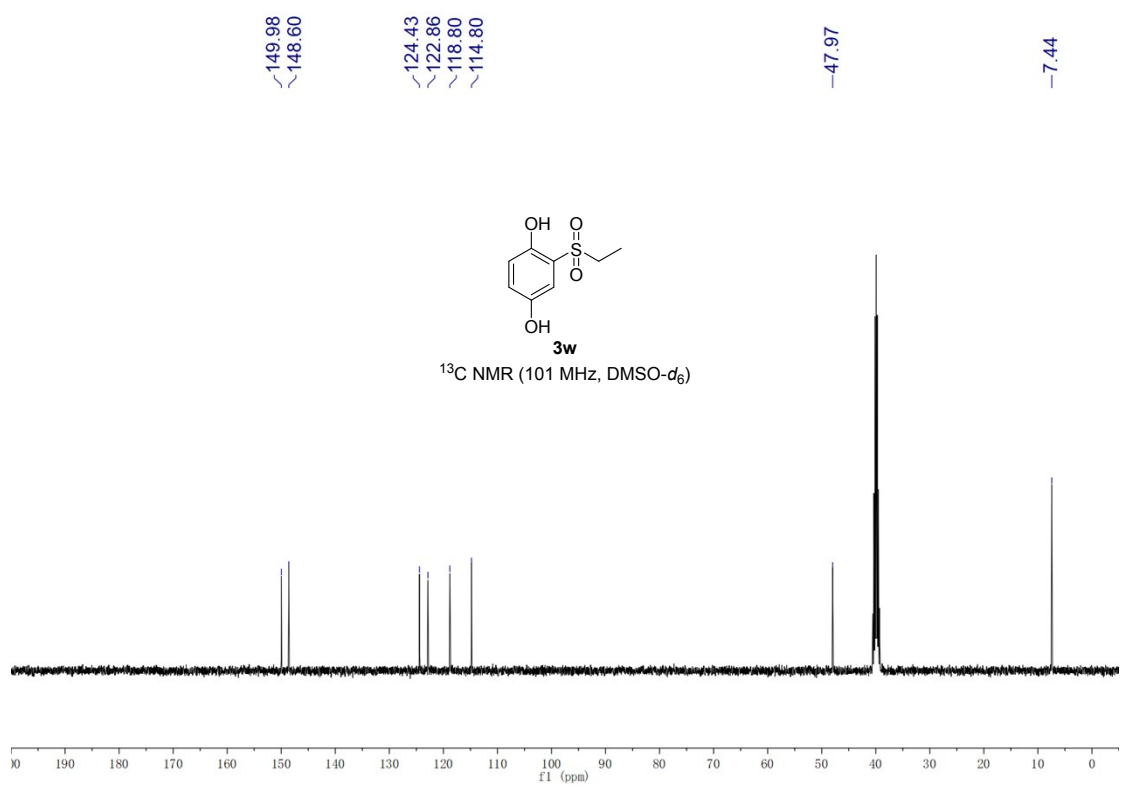

Supplement: d0nj05285j1.pdf [file d0nj05285j1.pdf]
